1

2 Identifying small molecule probes of ENTPD5 through high throughput screening

3

4 Matthew A. Durst<sup>1</sup>, Kiira Ratia<sup>2,3</sup>, and Arnon Lavie<sup>1,4\*</sup>

5 <sup>1</sup>Department of Biochemistry and Molecular Genetics, University of Illinois at Chicago, Chicago, Illinois,  
6 USA.

7 <sup>2</sup>Research Resources Center, University of Illinois at Chicago, Chicago, Illinois, USA

8 <sup>3</sup>Department of Medicinal Chemistry and Pharmacognosy, University of Illinois at Chicago, Chicago,  
9 Illinois, USA

10 <sup>4</sup>The Jesse Brown VA Medical Center, Chicago, Illinois, USA.

11

12 \*Corresponding author

13 E-mail: Lavie@uic.edu (AL)

14

## 15 **Abstract**

16           Ectonucleoside Triphosphate Diphosphohydrolase 5 (ENTPD5) has been shown to be important  
17 in maintaining cellular function in cancer, and its expression is upregulated through multiple, unique  
18 pathways in certain cancers, including laryngeal, glioblastoma multiforme, breast, testicular, and prostate.  
19 ENTPD5 supports cancer growth by promoting the import of UDP-glucose, a metabolite used for protein  
20 glycosylation and hence proper glycoprotein folding, into the ER by providing the counter molecule,  
21 UMP, to the ER antiporter. Despite its cancer-supporting function, no small molecule inhibitors of  
22 ENTPD5 are commercially available, and few studies have been performed in tissue culture to understand  
23 the effects of chemical inhibition of ENTPD5. We performed a high-throughput screen (HTS) of 21,120  
24 compounds to identify small molecule inhibitors of ENPTD5 activity. Two hits were identified, and we  
25 performed a structure activity relationship (SAR) screen around these hits. Further validation of these  
26 probes were done in an orthogonal assay and then assayed in cell culture to assess their effect on prostate  
27 cancer cell lines. Notably, treatment with the novel ENTPD5 inhibitor reduced the amount of  
28 glycoprotein produced in treated cells, consistent with the hypothesis that ENTPD5 is important for  
29 glycoprotein folding. This work serves as an important step in designing new molecular probes for  
30 ENTPD5 as well as further probing the utility of targeting ENTPD5 to combat cancer cell proliferation.

31

## 32 Introduction

33 Ectonucleoside Triphosphate Diphosphohydrolase 5 (ENTPD5) is the endoplasmic reticulum  
34 (ER) resident member of the NTPDase enzyme family. Unlike other members of this family, which  
35 generally catalyze the removal of the gamma and beta phosphates on triphosphate nucleotides, ENTPD5  
36 catalyzes the removal of the terminal phosphate of UDP and GDP to form UMP and GMP,  
37 respectively[1]. This hydrolysis of UDP to UMP provides a counter molecule for the ER UDP-Glucose  
38 antiporter, which imports new UDP-glucose into the ER for proper glycoprotein folding[2].

39 ENTPD5 is overexpressed through two independent pathways in cancer cells. PTEN null tumors  
40 promote ENTPD5 expression via the PI3K signaling pathway, through the activation of Akt by PIP3 to  
41 p-Akt, and the sequestration of FoxO transcription family to the cytoplasm[3]. This sequestration of FoxO  
42 releases its negative regulation on ENTPD5 expression[4]. Due to the importance of ENTPD5 for the ER  
43 processing of cell surface receptors, many of which signal through the PIP3/Akt pathway, a positive  
44 feedback loop exists to accelerate ENTPD5 expression, cell growth, and glucose utilization[4] (Fig 1).  
45 The PTEN gene is at least partially deleted in 10-30% of prostate cancer tumor samples and predicts poor  
46 clinical outcomes[5-8]. ENTPD5 is also overexpressed in p53 gain-of-function mutations through  
47 interaction of Mut-p53 with Sp1 ENTPD5's promoter region[9].

### 48 **Fig 1. ENTPD5 is an ER-resident UDPase important for proper glycoprotein folding.**

49 Schematic diagram highlighting the role ENTPD5 plays in the glycoprotein refolding cycle in the ER. For  
50 proper glycoprotein folding to occur, UDP-glucose is brought into the ER by an antiporter that uses UMP as the  
51 counter molecule. ENTPD5 activity produces UMP, leading to increased levels of UDP-glucose entering the ER for  
52 glycoprotein refolding. ENTPD5 expression is upregulated through two independent pathways: PI3-AKT axis  
53 signaling and mutant p53 interactions.

54 ENTPD5 is believed to support cancer growth via two mechanisms. First, the high protein  
55 synthesis demand of cancer cells puts the protein folding machinery under stress, including the machinery  
56 to properly fold glycosylated proteins trafficked through the ER. ENTPD5 relieves ER stress in cancer  
57 cells by providing UMP for the UDP-glucose antiporter, allowing for more cycles of glycoprotein folding  
58 in the ER (Fig 1) [1, 4, 10]. Without the required post-translational glycosylation events in the ER, the

59 unfolded protein response would be activated and the various growth factor receptors and nutrient  
60 transporters would be marked for degradation due to misfolding<sup>[11]</sup>. Overexpression of ENTPD5 allows  
61 cells to make large amounts of glycoproteins, including growth factor receptors and nutrient transporters  
62 that can activate a positive feedback loop through the PIP3/Akt pathway. Second, the altered metabolic  
63 state of cancer cells (i.e. the Warburg effect) affects nucleotide pools, and ENTPD5 helps to promote a  
64 balanced nucleotide pool compatible with the requirements of the cancer cell<sup>[4]</sup>.

65 ENTPD5's promise as a target against cancer was demonstrated using inducible shRNA in  
66 xenograft models. LNCaP cells with inducible shRNA against ENTPD5 showed reduced tumor burden  
67 after knockdown<sup>[4]</sup>, and MDA-MB-231 xenografts also showed reduced tumor growth following  
68 knockdown<sup>[9]</sup>. Furthermore, the viability of ENTPD5 knockout mice demonstrate the non-essentiality of  
69 this enzyme for normal tissue<sup>[10]</sup>.

70 Currently, no small molecule inhibitors against ENTPD5 are validated in the peer-reviewed  
71 literature, though a 2010 Ph.D. thesis describes several small molecule inhibitors of ENTPD5 that show  
72 activity in cell culture at 10  $\mu$ M<sup>[12]</sup>. IC<sub>50</sub> values were not determined in that study or subsequent patent  
73 application. To discover additional and potentially more potent ENTPD5 inhibitors, we performed a  
74 high-throughput screen (HTS) and subsequent structure activity relationship (SAR) that identified novel  
75 small molecular probes of this important enzyme. The probes identified through HTS were further  
76 validated in an orthogonal assay and then assayed in cell culture to assess their effect on prostate cancer  
77 cell lines. These validated molecular probes provide at least two scaffolds for the further development of  
78 ENTPD5 inhibitors, and serve as an important step in probing the utility of targeting ENTPD5 to combat  
79 cancer cell proliferation.

80

## 81 **Materials and methods**

### 82 **Materials**

83 All chemicals were reagent or molecular biology grade. Pfu ultra polymerase (600380-51) was  
84 purchased from Agilent. 6x DNA loading dye (R0611), 1kb DNA ladder (SM1333), and 10 mM  
85 premixed dNTPs (R0192) were purchased from Thermo-Scientific. Phusion polymerase (M05305),  
86 BamHI-HF (R31365), NDE1 (R011S), and Gibson Assembly Master Mix (M5510A) were purchased  
87 from New England Biolabs. QIAquick gel extraction kit (28706) and QIAprep spin miniprep kit (27004)  
88 were manufactured by Qiagen. All oligonucleotides for PCR amplification and mutagenesis were  
89 purchased from IDT. ATP (987-65-5) was purchased from Pharma Waldhof. UDP (94330), and UMP  
90 (U6375) were purchased from Sigma-Aldrich. D-Luciferin (14681) was made by Cayman Chemical.

### 91 **Gene synthesis, cloning, protein expression, and purification of** 92 **ENTPD5 from an *Escherichia coli* expression system**

93 Codon-optimized  $\Delta$ 43ENTPD5 for bacterial production was synthesized by Genscript with  
94 N-terminal NdeI and C-terminal BamHI sites and cloned into a modified tag-less pET14b vector in house.  
95 Site directed mutagenesis (Forward primer:  
96 CATCTCACATGGATCCGAGAATCTTTATTTTCAGGGCCATCATCACC; Reverse primer:  
97 GGTGATGATGGCCCTGAAAATAAAGATTCTCGGATCCATGTGAGATG) using Pfu ultra was  
98 used to generate a C-terminal His<sub>8</sub> tag for nickel chelate affinity purification. The resulting DNA  
99 construct (verified by Sanger sequencing) was transformed into C41(DE3) *E. coli* cells.

100 Cells were grown at 37 °C in 2xYT medium supplemented with 100 µg/mL ampicillin (Amp),  
101 treated with 0.1 mM isopropyl β-D-1-thiogalactopyranoside (IPTG) at an OD<sub>600</sub> nm of 0.6-0.8, and then

102 cultured for an additional 18h at 18 °C. Cells were harvested by centrifugation, washed with 200 mM  
103 NaCl and 25 mM Tris pH 7.5, and pelleted at 5000 rpm for 20 min before storage at -20°C.

104 Protein was purified from inclusion bodies using a refolding protocol modified from  
105 Murphy-Piedmonte *et al*<sup>[13]</sup>. After thawing, cells were lysed by sonication in 25 mM Tris pH 7.5, 200 mM  
106 NaCl, 10% glycerol, 1% Triton X-100, and 1 mM PMSF. Lysed cells were centrifuged at 20,000 rpm for  
107 30 min. The supernatant was decanted, and the resulting pellet was resuspended in 6 M guanidine-HCl  
108 with 25 mM Tris pH 8.0 and 10 mM DTT and left to stir overnight at 4°C. The solution was centrifuged  
109 at 20,000 RPM, 4°C, and the resulting denatured protein supernatant was stored at 4°C. The denatured  
110 protein was refolded by a quick dilution method in which 25 mL of 4 mg/mL denatured protein in 6 M  
111 guanidinium solution was added to 1 L of 600 mM NaCl, 100 mM Tris-HCl pH 8.5, 2 mM reduced  
112 glutathione, 1 mM oxidized glutathione, and 10% glycerol at a rate of 0.2 mL/min at 4°C with gentle  
113 stirring for 72 hours. The protein was precipitated with 60% ammonium sulfate, centrifuged at 14,000  
114 RPM for 1 hour, and the supernatant was discarded. The pellet was resuspended in 500 mM NaCl, 25 mM  
115 Tris pH 8.5, and 30 mM imidazole. This solution was loaded onto a 5-mL GE His-Trap column. Protein  
116 was eluted into 500 mM NaCl, 25 mM Tris-HCl pH 8.5, 250 mM imidazole. The purified protein was  
117 concentrated to 5 mL and injected onto S-200 gel filtration column (GE Healthcare) equilibrated with 250  
118 mM NaCl, 25 mM Tris-HCl pH 8.5. To confirm the purity, collected fractions were analyzed by  
119 SDS-PAGE and detected with Coomassie Brilliant Blue staining. Activity of purified protein was  
120 assessed using the Malachite Green assay (below). All fractions containing purified active protein were  
121 pooled and stored at -80°C. The ENTPD5 purified using *E. coli* expression (referred to as B.ENTPD5)  
122 was use for the HTS.

123 **Gene synthesis, cloning, protein expression, and purification of**  
124 **ENTPD5 from baculovirus expression vector system (BEVS)/insect**  
125 **cells for kinetics and validation**

126 Human cDNA for ENTPD5 with a C-terminal Flag tag was obtained from SinoBiology for BEVS and  
127 was cloned into a modified pAcGP67-A vector<sup>[14]</sup>. Site-directed mutagenesis was performed to introduce  
128 silent mutations in order to remove an internal EcoRI site (forward primer:  
129 AGGGAGCACTGGAACCTCGTATCCATGTTTACACCTTTGTG; reverse primer:  
130 CACAAAGGTGTAAACATGGATACGAGTTCCAGTGCTCCCT) and internal BamHI site (forward:  
131 GTTAGCATCATGGATGGCAGCGACGAAGGCATATTAG, reverse:  
132 CTAATATGCCTTCGTGCTGCCATCCATGATGCTAAC). Initially a  $\Delta$ 43ENTPD5 sequence with a  
133 C-terminal His<sub>8</sub> tag was amplified and inserted using the upstream BamHI site and downstream EcoRI  
134 sites, which preserved the pAcGP67-A export signal sequence in frame (forward primer:  
135 GCGGATCCCAGCGCCAGCACCTTGTATGG ; reverse primer:  
136 CGGAATTCTTAATGATGGTGATGATGGTGATGATGACCCCCATGGGAGATGCCC). The  
137 resulting DNA construct (verified by Sanger sequencing) was inserted into the Baculovirus genome using  
138 ProGreen linearized baculovirus genome kit (K20) from AB Vector according to the manufacturer.  
139 Baculovirus stocks were amplified in SF9 cells (11496015 Gibco) cultured in Sf-900 II SFM (10902096  
140 ThermoFisher). Six days after inoculation of 1 L of Hi-5 cells (B85502 ThermoFisher) cultured in  
141 Express Five SFM (10486025 ThermoFisher) with 100 mL of high-titer baculovirus, the cells were  
142 centrifuged at 4,000 RPM for 25 minutes, the supernatant was filtered with a 0.22  $\mu$ M filter and added to  
143 5 mL of loose Ni-Sepharose Excel beads (17371201 GE Life Sciences). The beads were washed with 500  
144 mM NaCl, 25 mM Tris-HCl pH 8.5, 25 mM imidazole, and the protein was eluted with 500 mM NaCl, 25  
145 mM Tris-HCl pH 8.5, 250 mM imidazole. The purified protein was concentrated to 5 mL and injected  
146 onto a S-200 gel filtration column equilibrated with 250 mM NaCl, 25 mM Tris-HCl pH 8.5. To confirm

147 the purity, collected fractions were analyzed by SDS-PAGE and detected with Coomassie Brilliant Blue  
148 staining. Activity of purified protein was assessed by Malachite Green assay. All fractions containing  
149 purified active protein were pooled and stored at -80 °C.

## 150 **Protein expression and purification of coupling enzymes**

### 151 **UMP/CMPK and luciferase from *E. coli***

152 A UMP/CMP kinase in the pGEX-GST vector was purified as previously described[15]. Briefly, cells  
153 were grown at 37 °C in 2xYT medium supplemented with 100 µg/mL Amp. Protein expression was  
154 induced with 0.1 mM IPTG. Following overnight growth at 20 °C, cells were harvested by centrifugation,  
155 washed with 200 mM NaCl and 25 mM Tris-HCl pH 7.5, pelleted at 5,000 rpm for 20 min, and frozen.  
156 After thawing, cells were lysed by sonication in 25 mM Tris-HCl pH 8.0, 200 mM KCl, 10% glycerol,  
157 1% Triton X-100, and 1 mM PMSF. Lysed cells were centrifuged at 20,000 rpm for 30 min. The  
158 supernatant was filtered using a 0.45 µm filter and loaded onto a 5 mL Glutathione-Sepharose column.  
159 Following a wash step with 200 mM KCl, 10 mM Tris-HCl pH 8.0, the protein was eluted with 200 mM  
160 KCl, 10 mM Tris-HCl pH 8.0, 10 mM reduced glutathione. 10 mM DTT was added to eluted protein,  
161 which was flash frozen and stored at -80°C.

162 Wild-type firefly luciferase in a pQE30 vector was obtained from the Branchini Lab[16]. Cells  
163 were grown at 37 °C in 2xYT medium supplemented with 100 µg/mL Amp and 25 µg/mL kanamycin.  
164 Protein expression was induced with 0.1 mM IPTG. Following overnight growth at 20 °C, cells were  
165 harvested by centrifugation, washed with 200 mM NaCl and 25 mM Tris-HCl pH 7.5, pelleted at 5,000  
166 rpm for 20 min, and frozen. After thawing, cells were lysed by sonication in 25 mM Tris-HCl pH 7.5, 200  
167 mM NaCl, 10% glycerol, 1% Triton X-100, and 1 mM PMSF. Lysed cells were centrifuged at 20,000  
168 rpm for 30 min, and the supernatant was filtered through a 0.45 µm filter and loaded onto a 5-mL  
169 His-Trap column. The column was washed with 250 mM NaCl, 25 mM Tris-HCl pH 7.5, 50 mM  
170 imidazole. The protein was eluted with 250 mM NaCl, 25 mM Tris-HCl pH 7.5, 250 mM imidazole.



171 Eluted protein was dialyzed into 150 mM NaCl, 50 mM Tris pH 7.5, 1 mM DTT, and 1 mM EDTA, flash  
172 frozen, and stored at -80°C.

## 173 **High throughput Screening**

174 Stocks of purified B.ENTPD5, UMPK, and luciferase were diluted to 0.4 mg/mL, 1.2 mg/mL, 4.5  
175 mg/mL, respectively, in 250 mM NaCl, 25 mM Tris-HCl pH 8.5, 5 mM MgCl<sub>2</sub>, 0.1 mg/mL BSA, and 5  
176 mM DTT and flash frozen. To prepare enzyme mix solution for HTS, ENTPD5 (1 ng/μL final  
177 concentration) and UMPK (3.5 ng/μL) were diluted in HTS buffer (250 mM NaCl, 25 mM Tris-HCl pH  
178 7.7, 5 mM MgCl<sub>2</sub>, 5 mM DTT, 0.1 mg/mL BSA, and 0.01% Triton X-100). An ENTPD5 null mix was  
179 made as above without ENTPD5 to provide maximal signal mimicking 100% inhibition. Substrate mix  
180 solution consisted of ATP (625 μM) and UDP (150 μM) in HTS buffer. Developer solution consisted of  
181 Luciferase (50 ng/μL) and D-luciferin (1.6 mM) in HTS buffer. All solutions were stored at 4°C, and  
182 equilibrated to room temperature prior to screening.

183 All steps of ENTPD5 HTS were performed at room temperature in duplicate 384-well plates. For  
184 each run, 40 μL of enzyme solution (or ENTPD5 null mix) was added to each well of a 384 well plate.  
185 0.1 μL of 10 mM compound (in 100% DMSO) from a 25,000 subset of the Chembridge DiverSet library  
186 or DMSO alone were added to wells by pin tool (V&P Scientific). Following a 10-minute incubation, the  
187 reaction was initiated with 10 μL of substrate mix (final concentrations: 40 ng/50 μL ENTPD5, 140 ng/50  
188 μL UMPK, 125 μM ATP, 30 μM UDP, 20 μM test compound). Assay plates were shaken at 1500 rpm  
189 for 30 seconds and then incubated for 1h. Following incubation, 10 μL of developer solution was added to  
190 each well (final concentrations: 500 ng/60 μL luciferase, 266 μM D-luciferin). The plate was shaken for  
191 30 seconds and incubated for 30 minutes. Luminescence readings were performed on a Tecan Infinite  
192 F200Pro with automatic attenuation settings and 100 ms integration time.

193 Hits and hit analogs were (re)purchased from Chembridge for SAR studies. Compounds were  
194 assayed at 5 μM, 10 μM, 20 μM, and 40 μM using the assay described above.

## 195 **Malachite green assay**

196 Malachite Green (MG) assay[17] for free phosphate was used to directly test ENTPD5 activity.  
197 Standard curves for each preparation of malachite green were generated using known amounts of free  
198 phosphate. Reactions were carried out at room temperature in 1-mL cuvettes and OD 630 nm  
199 measurements were performed on a Nanodrop 2000c. ENTPD5 assays were initiated by adding UDP (100  
200  $\mu$ M final concentration) to a cuvette containing 800  $\mu$ L of ENTPD5 (10 ng) in reaction buffer (250 mM  
201 NaCl, 5 mM MgCl<sub>2</sub>, 25 mM Tris-HCl pH 8.5). After 5 minutes, the reaction was quenched with 200  $\mu$ L  
202 of MG buffer (13.1% (v/v) Concentrated sulfuric acid, 2.64 mM malachite green, 1.4% (w/v) ammonium  
203 molybdate, and 0.17% (v/v) Tween 20) and mixed by pipet. The OD 630 nm was measured after an  
204 additional 5-minute incubation. IC<sub>50</sub> values were calculated by GraphPad Prism 6 using sigmoidal  
205 interpolation model with 95% confidence intervals.

## 206 **Cell culture**

207 LNCaP (ATCC CFL-1740) and DU-145 (ATCC HTB-81) cell lines were cultivated in a humid  
208 atmosphere (5% CO<sub>2</sub>, 37°C) using RPMI 1640 with L-glutamine (10-040-CV Corning) media  
209 supplemented with 10% FBS (SH30910.03 Hyclone) and 1x penicillin-streptomycin solution  
210 (Invitrogen). All cell lines were analyzed by STR (Short Tandem Repeat) and confirmed to match to  
211 corresponding STR profile data from the Global Bioresource Center ATCC or ExPASy Cellosaurus  
212 database. All cell lines were verified to be mycoplasma free.

## 213 **Growth inhibition assay**

214 5,000 cells were plated on day 0 in a 96-well plate. On day 1, before treatment, each well was imaged  
215 and direct cell counting was performed using a Celigo S (Nexcelom) imager and automatic cell counting  
216 software provided with the instrument. Compounds were added to final concentrations of 0.15  $\mu$ M- 20  
217  $\mu$ M. 48 hours after treatment, wells were re-imaged and counted using the pre-treatment counting

218 procedure. Growth was reported as the fold increase over the baseline measurement and normalized to  
219 DMSO controls. Experiments were performed in triplicate, in three separate experiments. EC<sub>50</sub> values  
220 were calculated by GraphPad Prism 6 using a sigmoidal interpolation model with 95% confidence  
221 intervals.

## 222 **Western Blots**

223 LNCaP and DU145 cells were treated with 10  $\mu$ M compound or DMSO control. 24h post-treatment,  
224 cells were washed with ice cold PBS, scraped, pelleted and stored at -80°C until use. Frozen cell pellets  
225 were lysed with lysis buffer consisting of 20 mM HEPES pH. 7.4, 150 mM NaCl, 1% Triton X-100,  
226 1 mM EGTA, 1 mM EDTA, 10 mM sodium pyrophosphate, 100 mM NaF, 5 mM iodoacetic acid, 20 nM  
227 okadaic acid, 0.2 mM phenylmethylsulfonyl flouride (PMSF), and complete protease inhibitor cocktail  
228 tablets (Roche Diagnostics). Samples containing 50  $\mu$ g of protein were suspended in SDS loading buffer,  
229 separated on 4–12% SDS polyacrylamide gels (GenScript #M41215) and electrotransferred to PVDF  
230 membranes (Millipore Immobilon-FL #IPFL00010). Precision Plus Protein Standards all blue (Bio-Rad  
231 161-0373) were included as molecular weight markers. Immunoblotting was performed using standard  
232 methods, with TBS-T and TBS-T with 5% BSA as the wash and blocking/primary antibody dilution  
233 solutions, respectively. Total protein was measured with Ponceau-S staining prior to probing with  
234 antibodies. Membranes were incubated overnight at 4°C with primary antibodies diluted 1:1000 unless  
235 noted otherwise. Antibodies included: mouse monoclonal anti-ENTPD5 (Santa Cruz Biotechnology –  
236 sc-377172, 1:100 dilution), rabbit monoclonal anti-PTEN (Cell Signaling - 138G6), rabbit monoclonal  
237 anti-Sp1 (abcam - ab124804), rabbit monoclonal anti-GAPDH (Cell Signaling - 2118), and mouse  
238 monoclonal anti-O-GlcNAc (BioLegend - 838004). Membranes were incubated with 1:20,000 dilutions  
239 of IRDye 800CW Goat anti-Mouse IgG (LI-COR #925-32210) and IRDye 680RD Goat anti-Rabbit IgG  
240 (LI-COR #925-68071) for 1 h at room temperature, visualized on a LI-COR CLx near IR scanner.

241 Western blot quantification was normalized to total protein levels and analyzed in ImageStudio  
242 (LI-COR).

243

## 244 **Results**

### 245 **Recombinant expression and purification of ENTPD5.**

246 An N-terminal truncation construct of ENTPD5 was recombinantly expressed in *E. coli* as well as  
247 in insect cells using the baculovirus expression vector system (BEVS). The protein was expressed as a  
248 43-residue N-terminal truncation to more closely mimic the mature protein resulting from cleavage of its  
249 ER signal sequence (residues 1-24). The deletion was extended to residue 43 after analysis of sequence  
250 alignments with other members of the ENTPD family across species as well as the known crystal  
251 structures of rat ENTPD1[18] and ENTPD2[19] to avoid potential complications with a cysteine residue  
252 at position 39. The structure of ENTPD5 is predicted to contain two conserved disulfide bonds (Fig 2a).  
253 Cysteine-39 is a non-conserved cysteine that is predicted to not be required for proper protein folding, and  
254 its absence should reduce the propensity for the formation of incorrect disulfide bridges, especially in the  
255 process of refolding the enzyme. For bacterial expression, bacterial codon-optimized human ENTPD5  
256 44-428 (B.ENTPD5) was cloned into pET14b vector with a C-term His<sub>8</sub>-tag (Fig 2a). Recombinant  
257 ENTPD5 was also produced in insect cells (I.ENTPD5) using BEVS. This expression system produced  
258 natively active protein without denaturing, refolding, or shuffling of disulfide bonds.

#### 259 **Figure 2: ENTPD5 construct, purification, and activity.**

260 **A)** Diagram of ENTPD5 construct used for recombinant protein production, highlighting the expected internal  
261 disulfide bonds. **B)** SDS-PAGE gel of ENTPD5 purified from insect cells (lane **I**) and from bacteria (lane **B**).  
262 Molecular weight marker (lane **MW**) sizes in kDa are shown to the left of the gel. BSA, the additional band in lane  
263 **B** at 66 kDa, was added post-purification to stabilize B.ENTPD5. **C)** Gel filtration traces of recombinant ENTPD5  
264 proteins. **D)** Michaelis-Menten plot of purified I.ENTPD5 activity with substrate UDP using the Malachite Green  
265 assay.  $K_m$ :  $480 \pm 111 \mu\text{M}$ ;  $k_{cat}$ :  $783 \pm 68 \text{ s}^{-1}$ . Reactions were performed in triplicate. Error bars designate standard  
266 deviation.

267 Both sources of purified protein appear the same size on SDS-PAGE (Fig 2b) and behave  
268 similarly on gel filtration, corresponding to the expected monomeric size (Fig 2c). The ~65 kDa band  
269 observed in the B.ENTPD5 sample is BSA added post-purification for protein stability purposes.

270 Maximum enzymatic activity was achieved using the I.ENTPD5 protein (Fig 2d), corresponding to a  
271 ~30% increase in  $k_{cat}$  relative to that previously reported for refolded hENTPD5 purified from bacteria<sup>[13]</sup>.

## 272 **High-throughput screening to identify inhibitors of ENTPD5.**

273 To discover ENTPD5 inhibitors, a coupled enzyme assay was developed for high-throughput  
274 screening. The ENTPD5 reaction ( $UDP \rightarrow UMP + Pi$ ) was coupled with uridine monophosphate kinase's  
275 (UMPK) reaction with UMP ( $UMP + ATP \rightarrow UDP + ADP$ ) to create a futile catalytic cycle consuming  
276 ATP (Fig 3a). After one hour, the residual ATP was measured with firefly luciferase. UMPK  
277 concentrations were chosen to ensure ENTPD5, not UMPK, was rate-limiting. The ATP concentration  
278 was chosen to maximize signal with no ENTPD5 present, and the reaction time was optimized to remain  
279 in the linear range of the assay. Initial UDP concentration was chosen to allow for multiple turnover  
280 events on a single molecule in the cycle. Due to the availability of higher yields of the bacterially  
281 produced enzyme, B.ENTPD5 was used for HTS and subsequent structure activity relationship studies.  
282 21,000 compounds were screened in duplicate at 20  $\mu$ M. The average  $Z'$  value of the 132-plate screen  
283 was 0.73, indicating a robust assay<sup>[20]</sup>. Five compounds producing >25% reproducible inhibition of  
284 ENTPD5 activity were selected for further analysis (0.02% hit rate) (Fig 3b, c).

### 285 **Figure 3: ENTPD5 HTS assay and screening results.**

286 **A)** Schematic of ENTPD5 HTS assay. Following a 1-hour coupled reaction of ENTPD5 and UMPK, the residual  
287 ATP is measured indirectly using luciferase. **B)** Replicate plot of ENTPD5 HTS, showing percent ENTPD5  
288 inhibition by compounds in each replicate set. Compounds were screened at 20  $\mu$ M in duplicate. Compounds  
289 producing >25% inhibition (blue shaded box in **B**) were selected for follow-up analysis and are shown in **C**.  
290 Percent ENTPD5 inhibition by each hit is shown in parentheses.

## 291 **Validation of ENTPD5 HTS hits**

292 Using I.ENTPD5, the five hits compounds were validated in the malachite green (MG) assay<sup>[17]</sup>,  
293 which directly measures free phosphate, a product of ENTPD5 activity. Compounds **1a**, **2a**, **2b**, and **4**  
294 displayed a dose-dependent inhibition of I.ENTPD5.

295 Hit compounds **1a**, **2a**, and **2b** were used as the basis for structure activity relationship studies, in  
296 which ten analogs that were at least 80% structurally similar to the initial hits were tested against  
297 ENTPD5 at 5, 10, 20 and 40  $\mu\text{M}$  (Fig 4). Analogs of compound **4** were not available from the supplier at  
298 the time of SAR. All three analogs of compound **1a** were inactive against ENTPD5, highlighting the  
299 importance of a methyl group at position R<sup>2</sup>. The compound **2** series SAR demonstrates that substitutions  
300 on the benzenesulfonamide are well tolerated (Fig 4, core A series). However, replacing the  
301 N-hydroxyphenyl group with an N-hydroxynaphthalene leads to a drastic loss in potency (Fig 4, core B  
302 series).

#### 303 Fig 4. Structure activity relationship of select ENTPD5 inhibitors identified by HTS.

304 Close analogs of hits **1a** (A) and **2a** (B) were assayed with B.ENTPD5 to assess the effect of conservative  
305 substitutions to the scaffolds. Compounds were assayed at 5, 10, 20, and 40  $\mu\text{M}$  using the coupled  
306 enzyme HTS assay to determine IC<sub>50</sub> values. Data were fit by nonlinear regression.

307 The most potent compounds from each inhibitor scaffold, **1a** and **2f**, were re-assayed in the MG  
308 assay at an expanded concentration range. Limited solubility of the hits prevented us from achieving a  
309 concentration required for full inhibition of the ENPTD5 activity. Nevertheless, these studies revealed  
310 IC<sub>50</sub> values of 3.14  $\mu\text{M}$  and 1.54  $\mu\text{M}$  for compounds **1a** and compound **2f**, respectively, and IC<sub>50</sub> >100  
311  $\mu\text{M}$  for inactive compound **1b** (Fig 5).

#### 312 Figure 5: ENTPD5 HTS hit characterization.

313 A) Structures of compounds **1a**, **1b**, and **2f**. B) ENTPD5 inhibition by compounds **1a**, **1b**, and **2f** using the MG  
314 assay. **1a** IC<sub>50</sub>: 3.1 ± 1.4  $\mu\text{M}$ ; **1b** EC<sub>50</sub> >100  $\mu\text{M}$ ; **2f** EC<sub>50</sub>: 1.5 ± 1.3  $\mu\text{M}$ . Error bars represent standard deviation from  
315 triplicate measurements.

## 316 Inhibition of prostate cancer cell growth by compound **1**

317 Since previous work related ENTPD5 levels to prostate cancer survival[4, 21], compounds **1a**, **1b**  
318 (as control), and **2f** were assayed with prostate cancer cell line LNCaP to determine their effect on cell  
319 proliferation. Treatment of LNCaP cells with **1a** for 48h drastically reduced the cell count, producing an  
320 EC<sub>50</sub> of 0.47  $\mu\text{M}$  (Fig 6a). As expected, inactive analog **1b** was much less potent against LNCaP cells

321 ( $EC_{50} > 10 \mu\text{M}$ ), however we were surprised to see that compound **2f** also was not effective in cell  
322 culture, with an  $EC_{50} > 10 \mu\text{M}$ . Compound **1a** was also assayed in an additional prostate cancer line,  
323 DU145, to investigate the effect of ENTPD5 inhibition on cell lines with differing modes of ENTPD5  
324 overexpression. LNCaP cells are PTEN null, while both DU145 and LNCaP cells have high levels of Sp1  
325 transcription factor[22]. After 48 hours of treatment, both cell lines were affected by inhibitor treatment.  
326  $EC_{50}$  values of  $0.47 \mu\text{M}$  and  $3.12 \mu\text{M}$  were obtained for LNCaP and DU145 cells, respectively (Fig 6b).

327 **Figure 6: Treatment of prostate cancer cell lines with ENTPD5 inhibitors.**

328 **A)** Growth of LNCaP cells treated with compound **1a**, **1b**, or **2f** for 48h. **1a**  $EC_{50}$ :  $0.47 \pm 1.28 \mu\text{M}$ ; **1b**  $EC_{50}$ :  $12.9 \pm$   
329  $3.3 \mu\text{M}$ ; **2f**  $EC_{50}$ :  $24 \pm 3 \mu\text{M}$ . **B)** Growth of LNCaP and DU145 cells treated with compound **1a** for 48h. **1a**  $EC_{50}$  in  
330 DU145:  $3.6 \pm 1.2 \mu\text{M}$ ; **1a**  $EC_{50}$  in LNCaP:  $0.47 \pm 1.28 \mu\text{M}$ . Relative cell count was normalized to DMSO-treated  
331 cell counts. Error bars represent standard error of the mean between three independent experiments.

332 To test the hypothesis that inhibition of ENTPD5 has an impact on cell growth due to the  
333 reduction of protein glycosylation and to further investigate the utility of **1a** as an effective molecular  
334 probe, we immunoblotted for total O-glycosylation levels within LNCaP and DU145 cells following 24  
335 hours of treatment at  $10 \mu\text{M}$  of compound **1a** and compound **2f**. First we verified that untreated LNCaP  
336 and DU145 cells have high levels of ENTPD5, Sp1, and O-glycosylation (Fig 7a). Compound **1a**, but not  
337 compound **2f**, reduced the amount of O-glycan present in the two prostate cell lines (Fig 7b, c). The  
338 decrease in O-glycan levels by compound **1a** is consistent with the effects of ENTPD5 inhibition on the  
339 glycoprotein refolding cycle. The inability of compound **2f** to reduce O-glycan levels could be attributed  
340 to low cell permeability but requires further investigation.

341 **Figure 7: O-glycan levels of cells treated with ENTPD5 inhibitors.**

342 **A)** Baseline levels of ENTPD5, PTEN, Sp1, and O-glycans in untreated LNCaP and DU145 cells. **B)** Levels of  
343 O-glycan in LNCaP and DU145 cells treated with  $10 \mu\text{M}$  **1a** or **2f** for 24h. Relative protein amounts were  
344 normalized to DMSO-treated cells from each cell line. Error bars represent standard deviation between 2  
345 experiments.

346



## 347 **Discussion**

348 Many of the newer anti-cancer approaches target a cancer driver. That is, the drugs target the  
349 oncogene that “drives” cancer growth, either as a growth factor receptor or a part of a downstream  
350 signaling cascade. However, these therapies are plagued by drug resistance, often due to the emergence of  
351 an alternative cancer driver or signaling cascade[23]. We postulate that targeting a factor that is required  
352 for cancer growth, irrespective of the cancer driver, would circumvent this type of resistance due to the  
353 natural tumor heterogeneity. In other words, as an alternative for targeting a cancer driver, which can be  
354 circumvented by other drivers in the heterogeneous cancer cell pool, we suggest targeting a cancer  
355 phenotype that is present in cancer cells regardless of any specific driver.

356 Indeed, several such cancer phenotypes exist, but some make for better targets than others. For  
357 example, the increased need for DNA metabolites to allow for the accelerated proliferation rate is a  
358 cancer phenotype. This phenotype is the basis for many current anti-cancer therapeutics, such as  
359 methotrexate and 5-fluoruracil, that target DNA replication. However, since many normal cells also have  
360 a high need for DNA replication, this class of drugs is associated with high toxicity. The challenge then is  
361 to identify a cancer phenotype that is largely absent in normal cells.

362 The fact that cancer cells have different metabolic needs outside of DNA replication generates a  
363 cancer phenotype that potentially can be targeted selectively. One component of this altered metabolism  
364 is increased expression of growth factor receptors and nutrient transporters. These membrane proteins  
365 undergo post-translational glycosylation in the ER before trafficking to the plasma membrane. In prostate  
366 cancer cells, the enzyme ENTPD5 plays a key role in maintaining the metabolite pool required for  
367 glycosylation. Importantly, ENTPD5 is not a prostate cancer driver, but rather ENTPD5 has been shown  
368 to be required for supporting prostate cancer growth. The important role ENTPD5 plays in prostate cancer  
369 proliferation is consistent with this enzyme being highly expressed in prostate cancer compared to normal  
370 prostate epithelium. Thus, an inhibitor of ENTPD5 would provide an innovative strategy to target the  
371 metabolic machinery that supports cancer growth instead of targeting a prostate cancer driver.

372           This paper lays the groundwork for future development of specific ENTPD5 inhibitors and  
373 molecular probes. The coupled HTS strategy that we developed was able to identify small molecules that  
374 were validated in a secondary enzyme activity assay and that show promising anti-proliferative activity  
375 against two prostate cancer cell lines. This highlights the potential of this strategy to be used for  
376 expanding HTS of ENTPD5 to larger compound collections. To our knowledge, the inhibitors identified  
377 here are the first direct small molecule inhibitors of ENTPD5 in the peer-reviewed literature. Further  
378 studies with these and additional ENTPD5 inhibitors will help to clarify whether ENPTD5 is a suitable  
379 new target for cancer therapy.  
380

## 381 **References**

382

383 1. Trombetta ES, Helenius A. Glycoprotein reglucosylation and nucleotide sugar utilization  
384 in the secretory pathway: identification of a nucleoside diphosphatase in the endoplasmic  
385 reticulum. *EMBO J.* 1999 Jun 15;18(12):3282-92. PubMed PMID: 10369669. Pubmed Central  
386 PMCID: 1171409.

387 2. Hirschberg CB, Robbins PW, Abeijon C. Transporters of nucleotide sugars, ATP, and  
388 nucleotide sulfate in the endoplasmic reticulum and Golgi apparatus. *Annu Rev Biochem.*  
389 1998;67:49-69. PubMed PMID: 9759482.

390 3. Tzivion G, Dobson M, Ramakrishnan G. FoxO transcription factors; Regulation by AKT  
391 and 14-3-3 proteins. *Biochim Biophys Acta.* 2011 Nov;1813(11):1938-45. PubMed PMID:  
392 21708191.

393 4. Fang M, Shen Z, Huang S, Zhao L, Chen S, Mak TW, et al. The ER UDPase ENTPD5  
394 promotes protein N-glycosylation, the Warburg effect, and proliferation in the PTEN pathway.  
395 *cell.* 2010 Nov 24;143(5):711-24. PubMed PMID: 21074248.

396 5. Vidotto T, Tiezzi DG, Squire JA. Distinct subtypes of genomic PTEN deletion size  
397 influence the landscape of aneuploidy and outcome in prostate cancer. *Mol Cytogenet.*  
398 2018;11:1. PubMed PMID: 29308088. Pubmed Central PMCID: 5753467.

399 6. Picanco-Albuquerque CG, Morais CL, Carvalho FL, Peskoe SB, Hicks JL, Ludkovski O,  
400 et al. In prostate cancer needle biopsies, detections of PTEN loss by fluorescence in situ  
401 hybridization (FISH) and by immunohistochemistry (IHC) are concordant and show consistent  
402 association with upgrading. *Virchows Arch.* 2016 May;468(5):607-17. PubMed PMID:  
403 26861919.

- 404 7. Phin S, Moore MW, Cotter PD. Genomic Rearrangements of PTEN in Prostate Cancer.  
405 Front Oncol. 2013;3:240. PubMed PMID: 24062990. Pubmed Central PMCID: 3775430.
- 406 8. Verhagen PC, van Duijn PW, Hermans KG, Looijenga LH, van Gurp RJ, Stoop H, et al.  
407 The PTEN gene in locally progressive prostate cancer is preferentially inactivated by bi-allelic  
408 gene deletion. J Pathol. 2006 Apr;208(5):699-707. PubMed PMID: 16402365.
- 409 9. Vogiatzi F, Brandt DT, Schneikert J, Fuchs J, Grikscheit K, Wanzel M, et al. Mutant p53  
410 promotes tumor progression and metastasis by the endoplasmic reticulum UDPase ENTPD5.  
411 Proc Natl Acad Sci U S A. 2016 Dec 27;113(52):E8433-E42. PubMed PMID: 27956623.  
412 Pubmed Central PMCID: 5206569.
- 413 10. Read R, Hansen G, Kramer J, Finch R, Li L, Vogel P. Ectonucleoside triphosphate  
414 diphosphohydrolase type 5 (Entpd5)-deficient mice develop progressive hepatopathy,  
415 hepatocellular tumors, and spermatogenic arrest. Vet Pathol. 2009 May;46(3):491-504. PubMed  
416 PMID: 19176496.
- 417 11. Hetz C, Chevet E, Harding HP. Targeting the unfolded protein response in disease. Nat  
418 Rev Drug Discov. 2013 Sep;12(9):703-19. PubMed PMID: 23989796.
- 419 12. HUANG S. Small Molecule Regulator of ENTPD5, and ER Enzyme in the PTEN/AKT  
420 Pathway [Doctoral]: University of Texas Southwestern Medical Center at Dallas; 2010.
- 421 13. Murphy-Piedmonte DM, Crawford PA, Kirley TL. Bacterial expression, folding,  
422 purification and characterization of soluble NTPDase5 (CD39L4) ecto-nucleotidase. Biochim  
423 Biophys Acta. 2005 Mar 14;1747(2):251-9. PubMed PMID: 15698960.
- 424 14. Antanasijevic A, Kingsley C, Basu A, Bowlin TL, Rong L, Caffrey M. Application of  
425 virus-like particles (VLP) to NMR characterization of viral membrane protein interactions. J

- 426 Biomol NMR. 2016 Mar;64(3):255-65. PubMed PMID: 26921030. Pubmed Central PMCID:  
427 4826305.
- 428 15. Segura-Pena D, Sekulic N, Ort S, Konrad M, Lavie A. Substrate-induced conformational  
429 changes in human UMP/CMP kinase. J Biol Chem. 2004 Aug 6;279(32):33882-9. PubMed  
430 PMID: 15163660.
- 431 16. Sundlov JA, Fontaine DM, Southworth TL, Branchini BR, Gulick AM. Crystal structure  
432 of firefly luciferase in a second catalytic conformation supports a domain alternation mechanism.  
433 Biochemistry. 2012 Aug 21;51(33):6493-5. PubMed PMID: 22852753. Pubmed Central PMCID:  
434 3425952.
- 435 17. Baykov AA, Evtushenko OA, Avaeva SM. A malachite green procedure for  
436 orthophosphate determination and its use in alkaline phosphatase-based enzyme immunoassay.  
437 Analytical Biochemistry. 1988;171(2):266-70.
- 438 18. Zebisch M, Krauss M, Schafer P, Strater N. Crystallographic evidence for a domain  
439 motion in rat nucleoside triphosphate diphosphohydrolase (NTPDase) 1. J Mol Biol. 2012 Jan  
440 13;415(2):288-306. PubMed PMID: 22100451.
- 441 19. Zebisch M, Baqi Y, Schafer P, Muller CE, Strater N. Crystal structure of NTPDase2 in  
442 complex with the sulfoanthraquinone inhibitor PSB-071. J Struct Biol. 2014 Mar;185(3):336-41.  
443 PubMed PMID: 24462745.
- 444 20. Zhang JH, Chung TDY, Oldenburg KR. A simple statistical parameter for use in  
445 evaluation and validation of high throughput screening assays. Journal of Biomolecular  
446 Screening. 1999 Apr;4(2):67-73. PubMed PMID: WOS:000080223000005. English.

- 447 21. Horak P, Tomasich E, Vanhara P, Kratochvilova K, Anees M, Marhold M, et al. TUSC3  
448 loss alters the ER stress response and accelerates prostate cancer growth in vivo. *Sci Rep.*  
449 2014;4:3739. PubMed PMID: 24435307. Pubmed Central PMCID: 3894551.
- 450 22. Hay CW, Hunter I, MacKenzie A, McEwan IJ. An Sp1 Modulated Regulatory Region  
451 Unique to Higher Primates Regulates Human Androgen Receptor Promoter Activity in Prostate  
452 Cancer Cells. *PLoS One.* 2015;10(10):e0139990. PubMed PMID: 26448047. Pubmed Central  
453 PMCID: 4598089.
- 454 23. Neel DS, Bivona TG. Resistance is futile: overcoming resistance to targeted therapies in  
455 lung adenocarcinoma. *NPJ Precis Oncol.* 2017;1. PubMed PMID: 29152593. Pubmed Central  
456 PMCID: 5687582.
- 457

## 458 **Supporting Information**

459 **S1 Fig. 1. Uncropped blots and ponceau stains of western blot images. A)** Ponceau for Fig. 6A ENTPD5 &  
460 PTEN. **B)** Uncropped image for Fig. 6A ENTPD5 on the 800 nm channel. **C)** Uncropped image for 6A PTEN  
461 (upper box) and GAPDH (lower box) in the 700 nm. **D)** Ponceau for Fig. 6A O-Glycan. **E)** Uncropped image for  
462 Fig. 6A O-Glycan on the 800 nm channel. **F)** Uncropped image for Fig. 6A SP1 (upper box) and GAPDH (lower  
463 box) on the 700 nm channel. **G)** Ponceau for Fig. 6B. **H)** Uncropped image for Fig. 6B O-Glycan on the 800 nm  
464 channel. Boxes represent area cropped for figures in the manuscript.

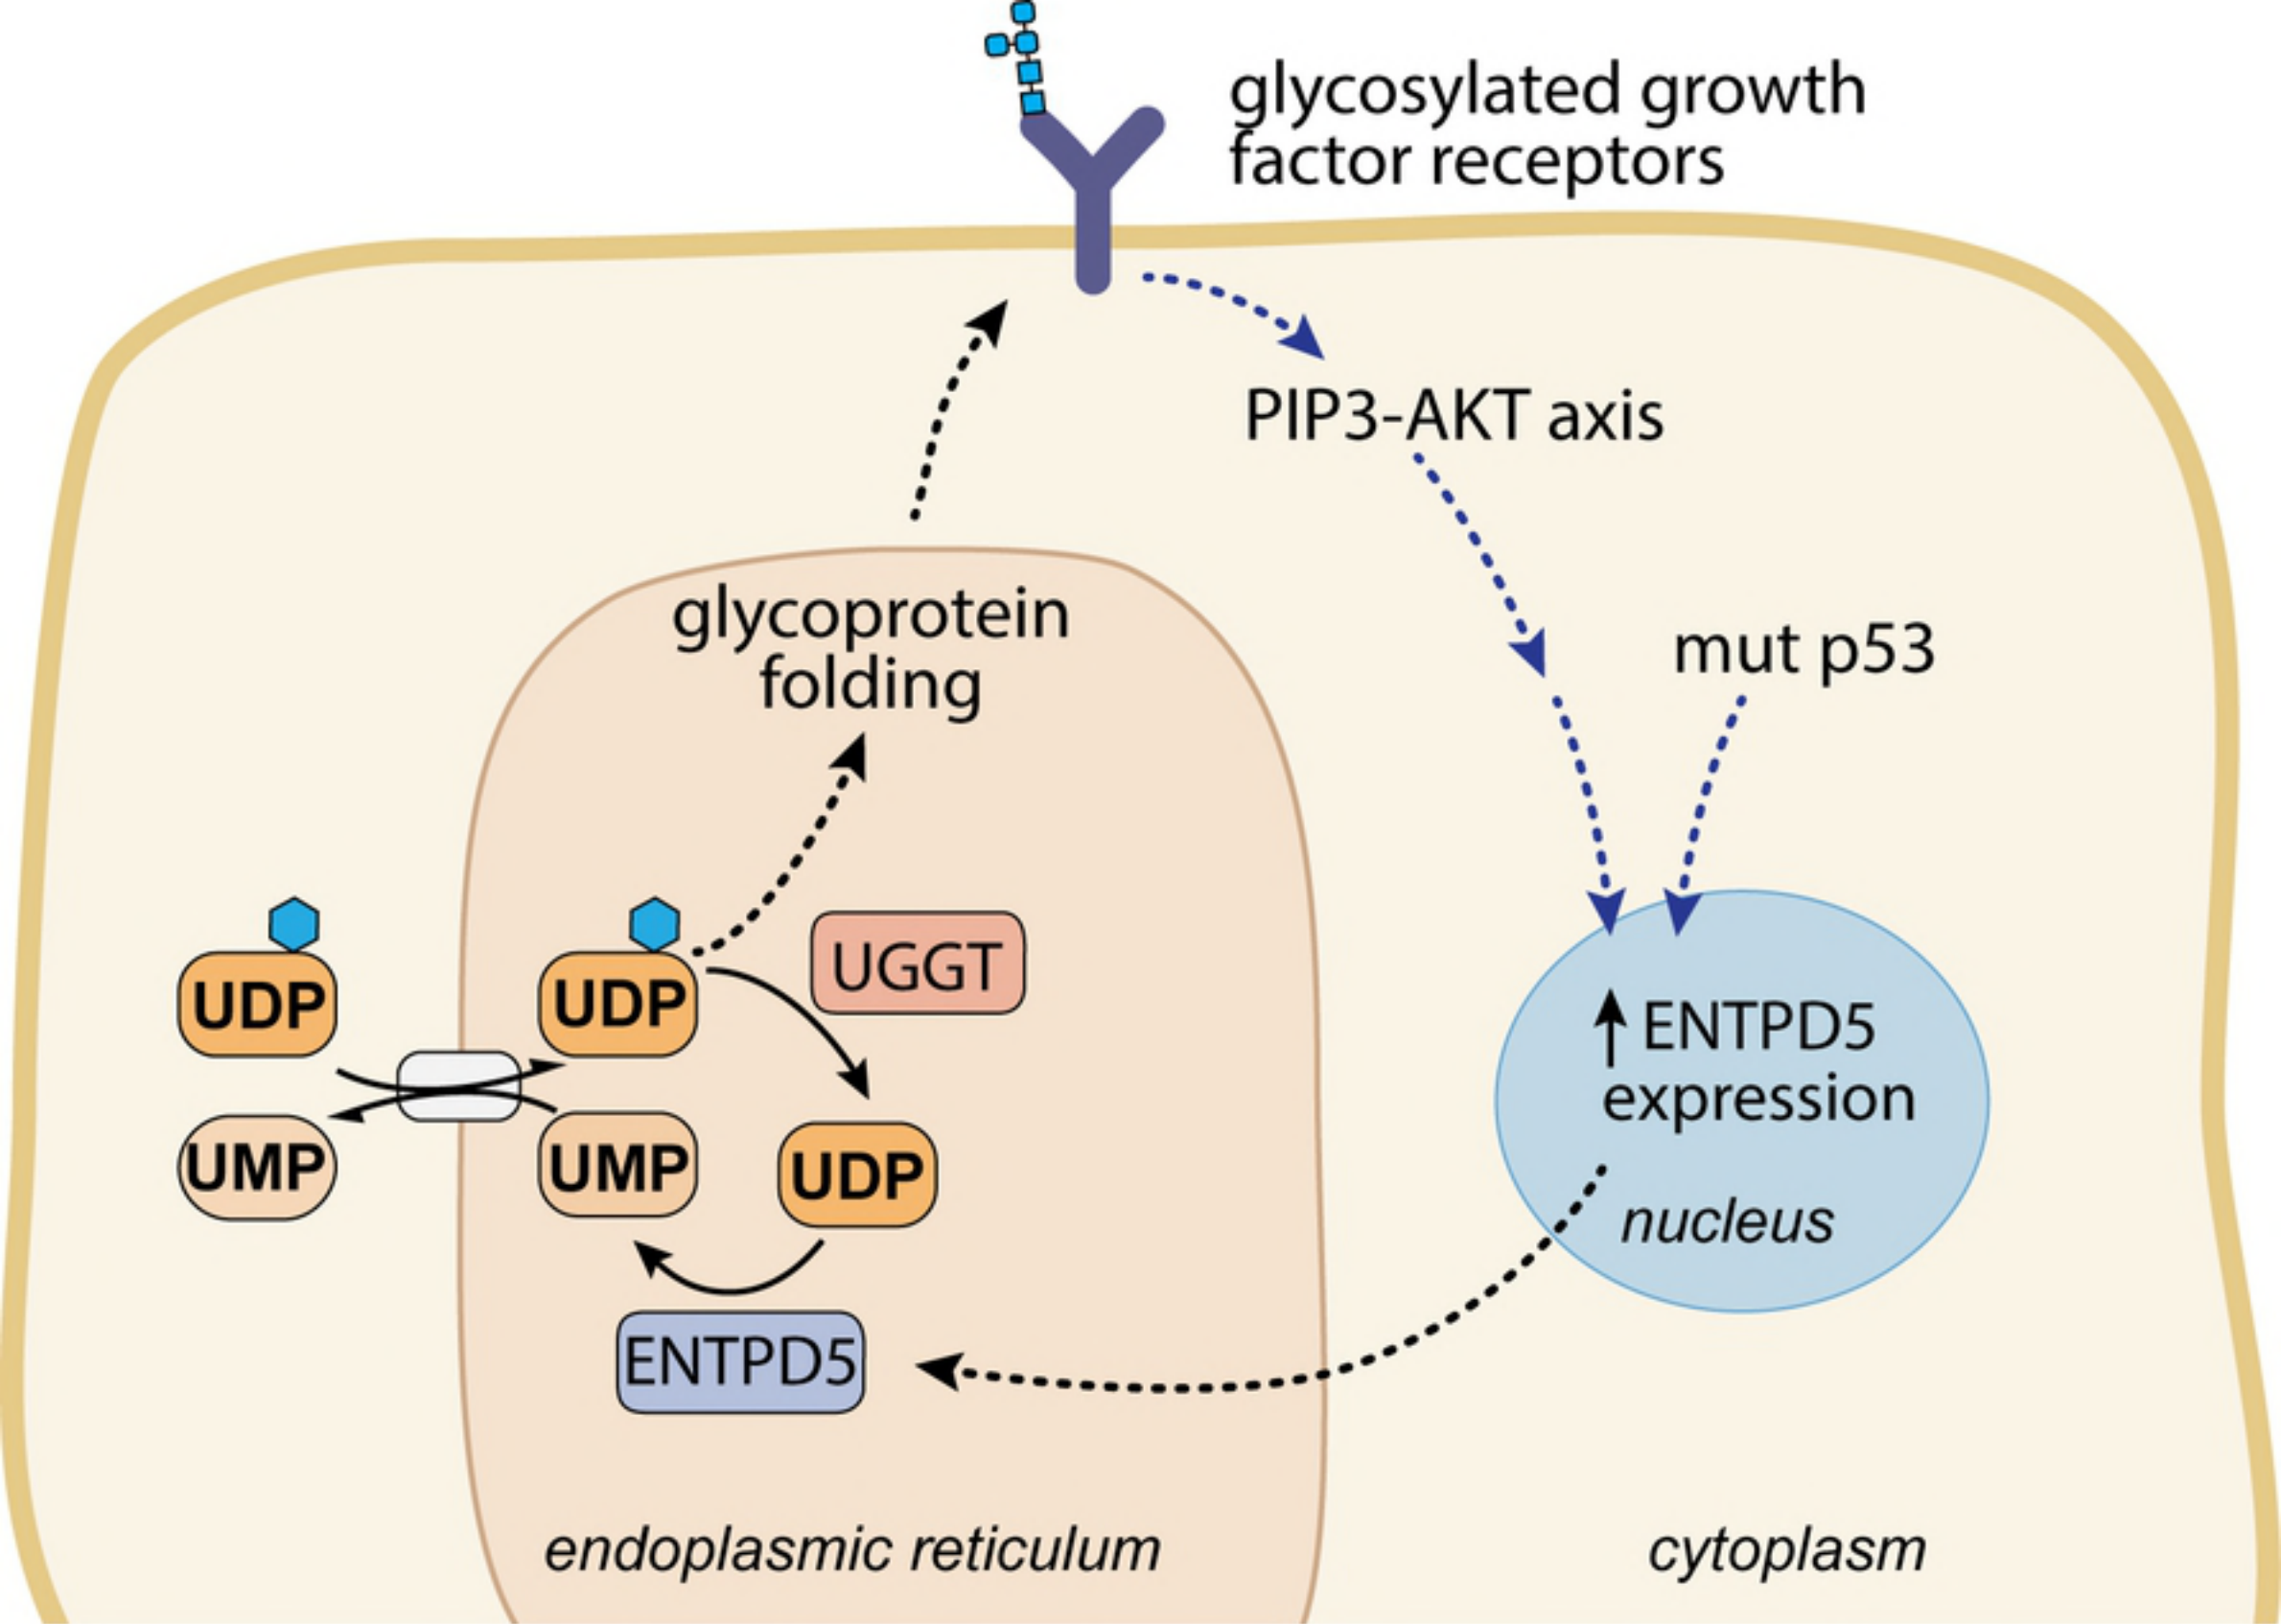

Fig. 1



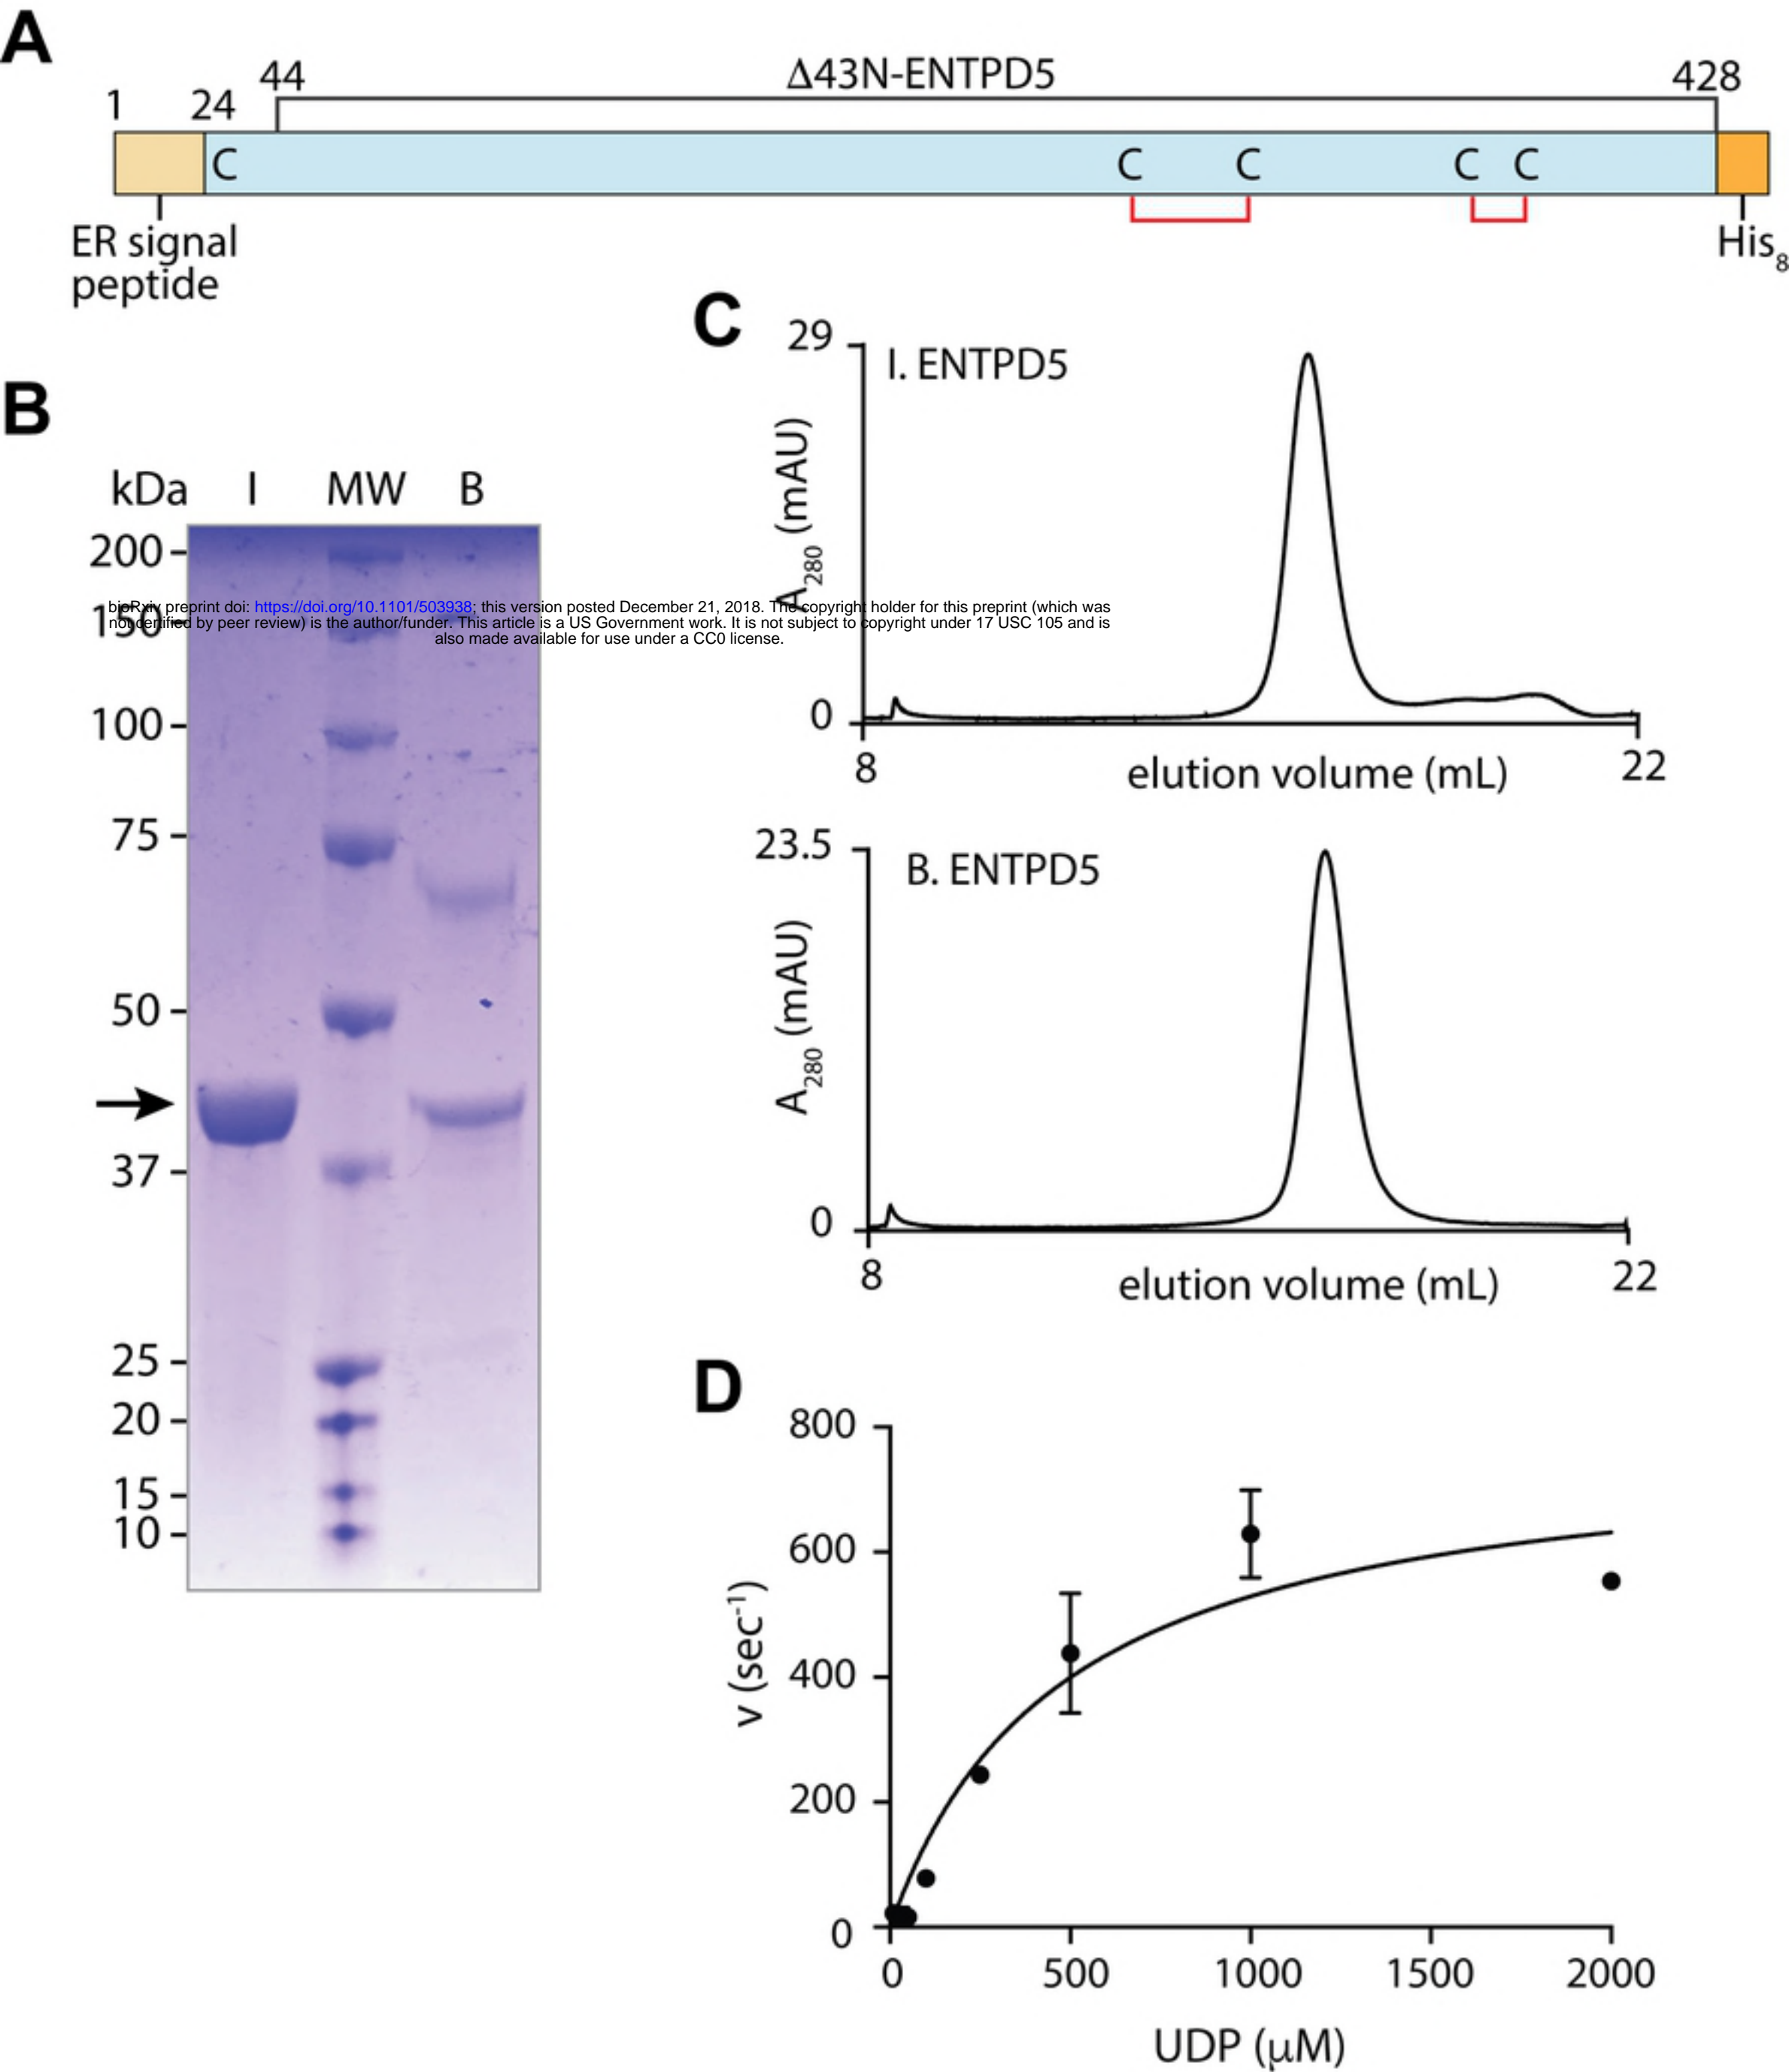

Fig. 2

**A**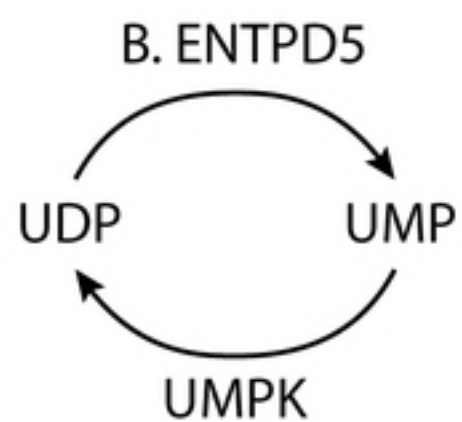**B**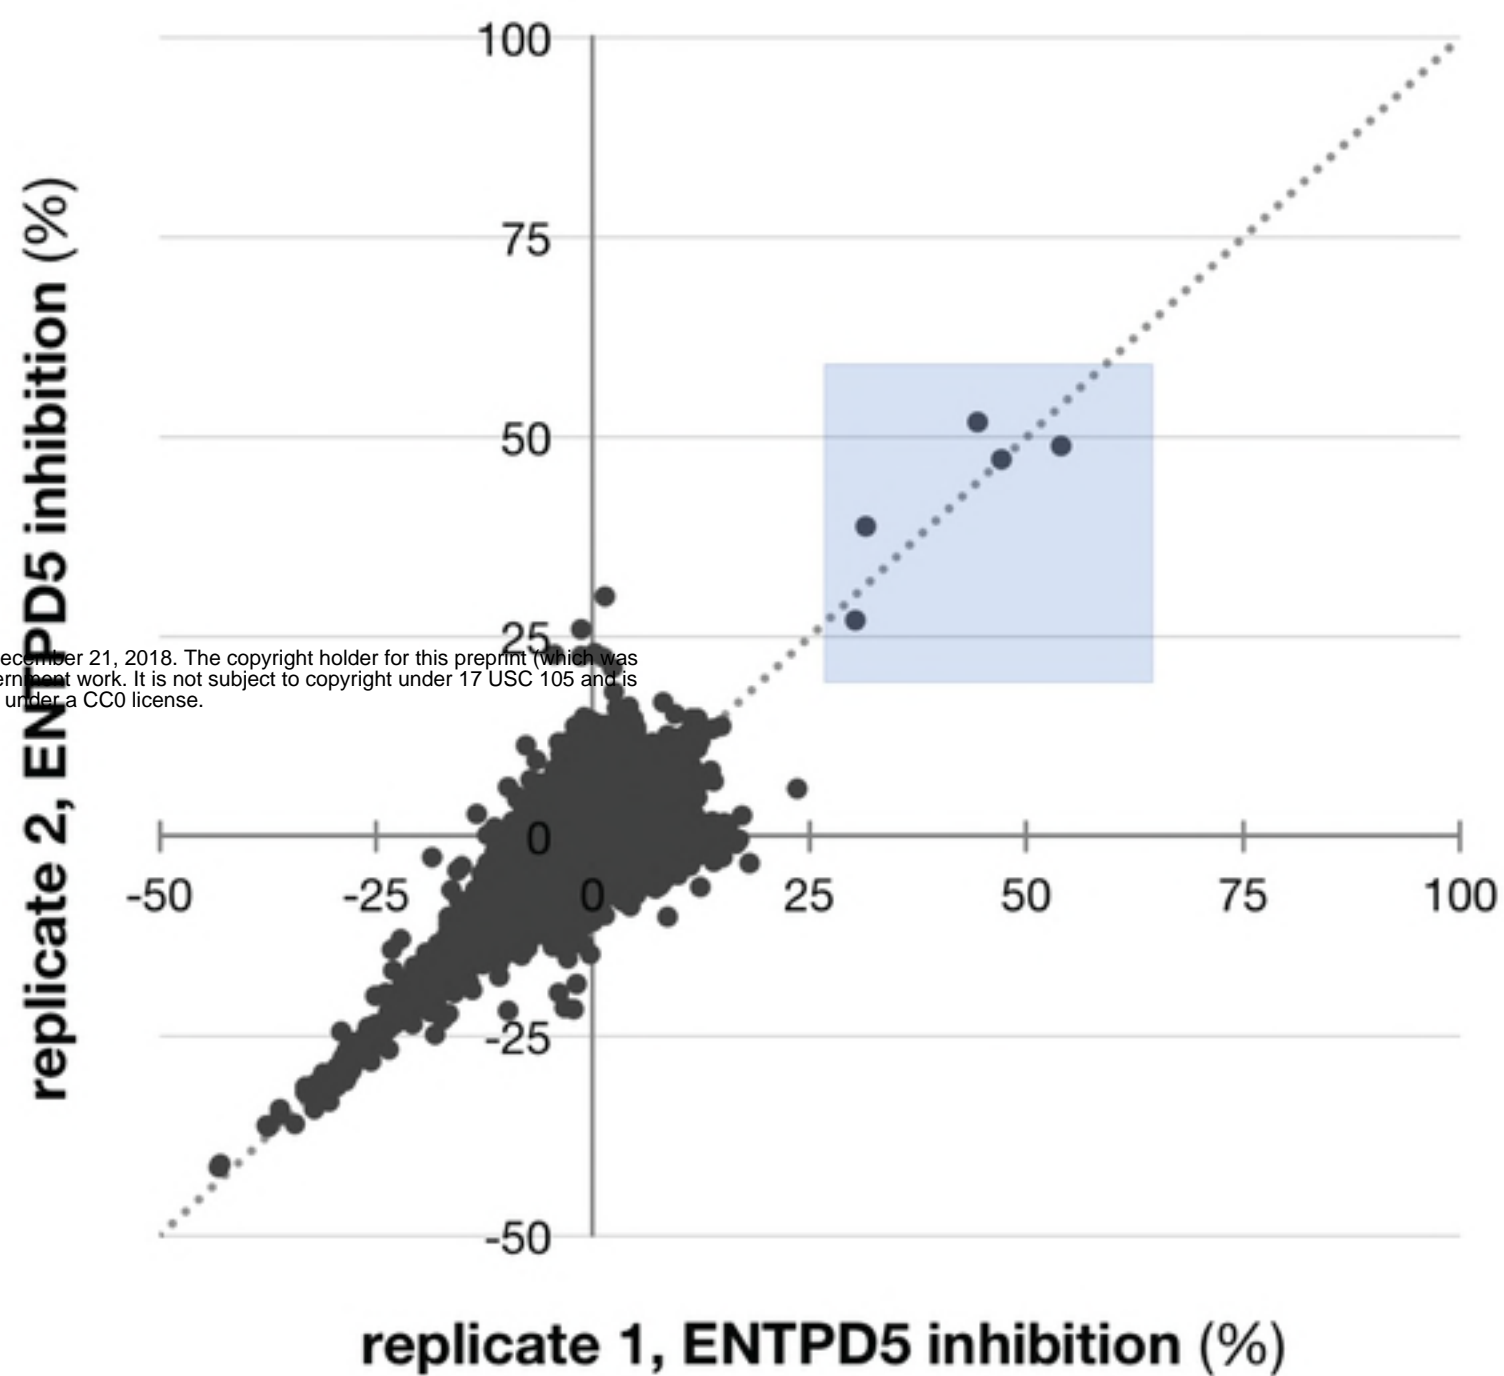**C**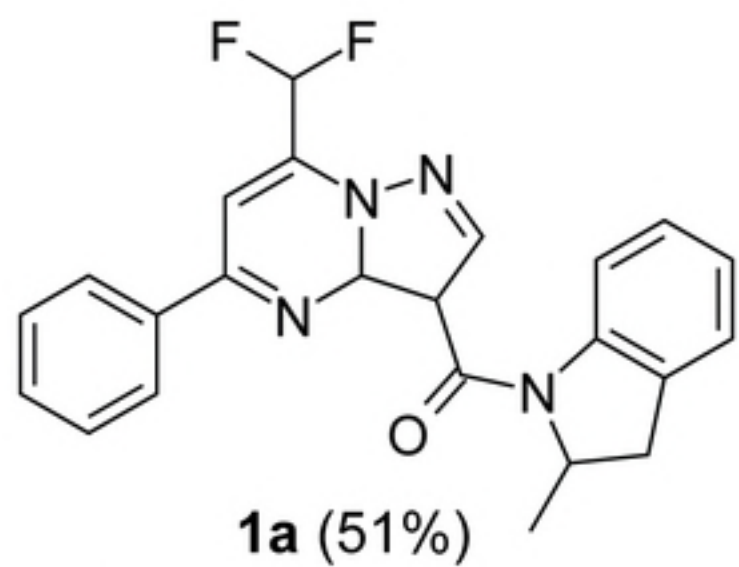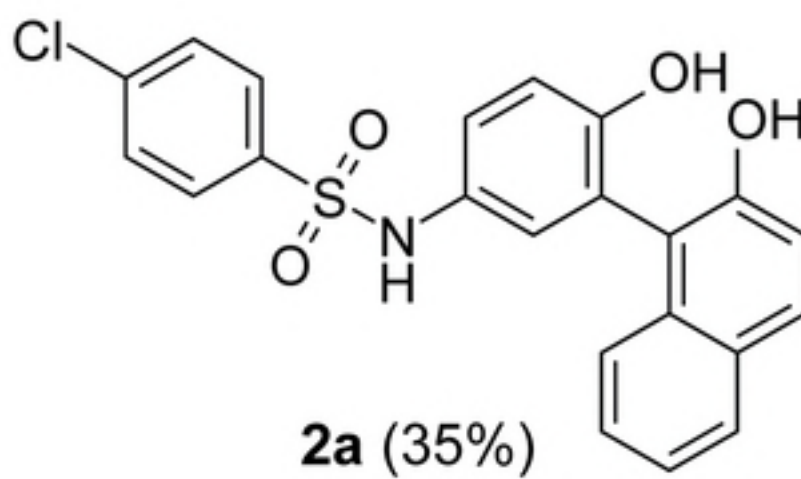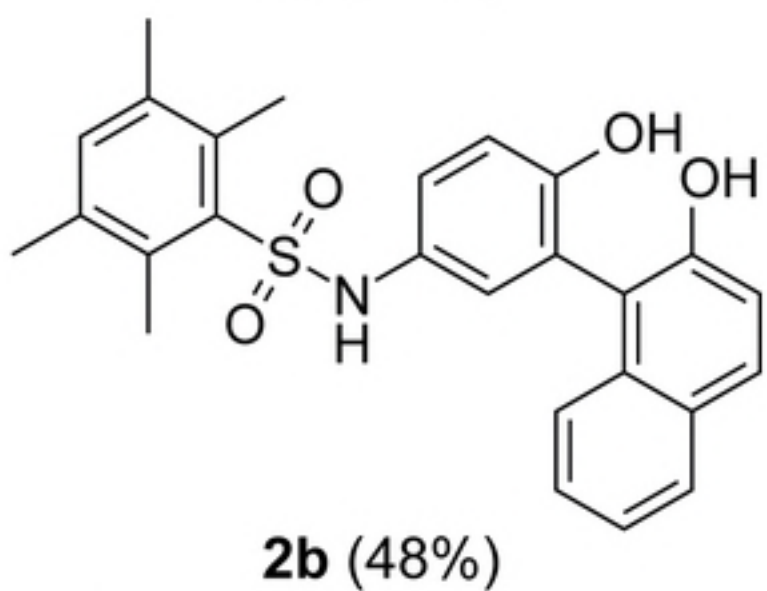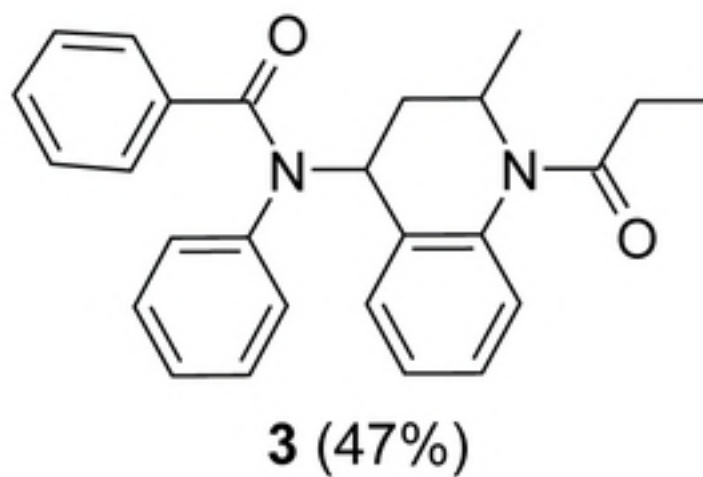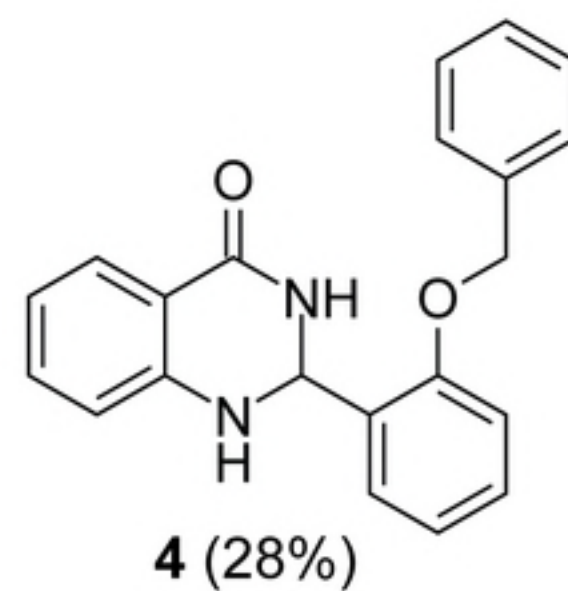

Fig. 3

**A**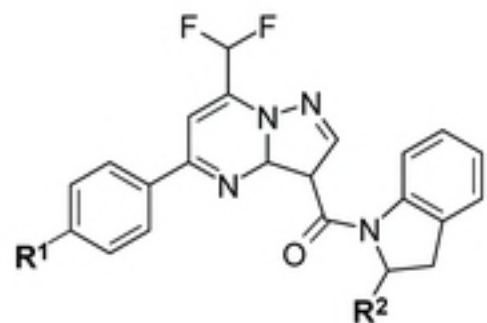

| compound  | R <sup>1</sup>    | R <sup>2</sup>   | IC <sub>50</sub> (μM) |
|-----------|-------------------|------------------|-----------------------|
| <b>1a</b> | -H                | -CH <sub>3</sub> | 3.1 ± 1.4             |
| <b>1b</b> | -H                | -H               | > 100                 |
| <b>1c</b> | -CH <sub>3</sub>  | -H               | > 100                 |
| <b>1d</b> | -OCH <sub>3</sub> | -H               | > 100                 |

**B**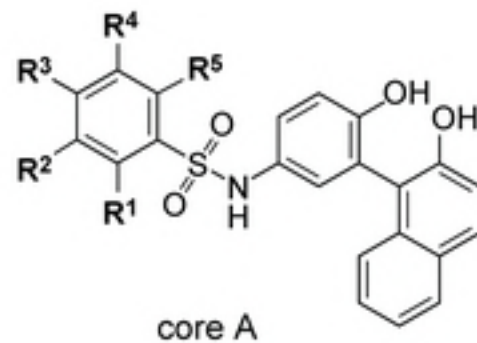

core A

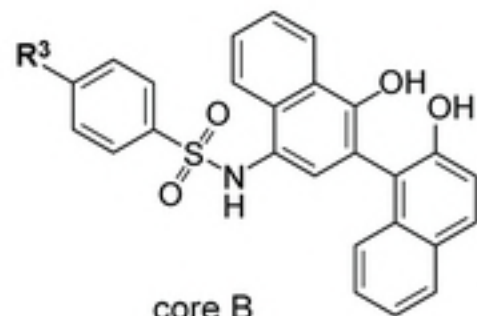

core B

| compound  | core | R <sup>1</sup>   | R <sup>2</sup>   | R <sup>3</sup>                    | R <sup>4</sup>   | R <sup>5</sup>   | IC <sub>50</sub> (μM) |
|-----------|------|------------------|------------------|-----------------------------------|------------------|------------------|-----------------------|
| <b>2a</b> | A    | -H               | -H               | -Cl                               | -H               | -H               | 6.7 ± 0.7             |
| <b>2b</b> | A    | -CH <sub>3</sub> | -CH <sub>3</sub> | -H                                | -CH <sub>3</sub> | -CH <sub>3</sub> | 3.7 ± 0.4             |
| <b>2c</b> | A    | -H               | -H               | -H                                | -H               | -H               | 6.8 ± 1.0             |
| <b>2d</b> | A    | -H               | -H               | -CH <sub>3</sub>                  | -H               | -H               | 7.1 ± 1.6             |
| <b>2e</b> | A    | -H               | -H               | -CH <sub>2</sub> CH <sub>3</sub>  | -H               | -H               | 4.3 ± 2.2             |
| <b>2f</b> | A    | -H               | -H               | -C(CH <sub>3</sub> ) <sub>3</sub> | -H               | -H               | 1.5 ± 1.3             |
| <b>2g</b> | A    | -H               | -H               | -Br                               | -H               | -H               | 8.3 ± 1.0             |
| <b>2h</b> | B    | -H               | -H               | -CH <sub>3</sub>                  | -H               | -H               | > 100                 |
| <b>2i</b> | B    | -H               | -H               | -Cl                               | -H               | -H               | > 100                 |

Fig. 4

**A**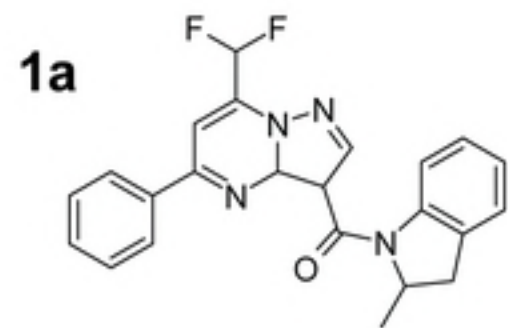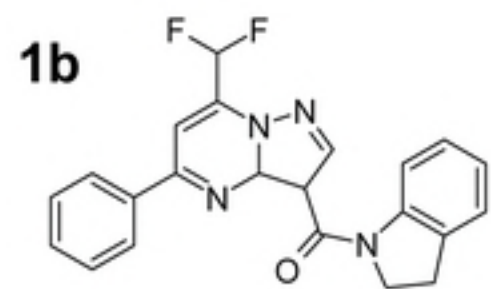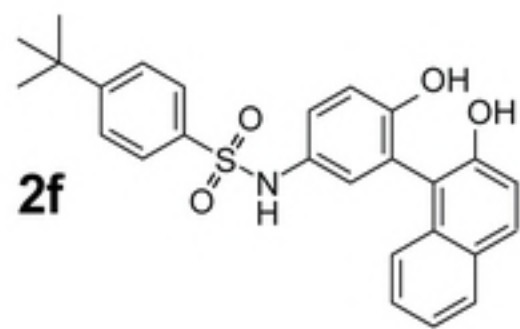**B**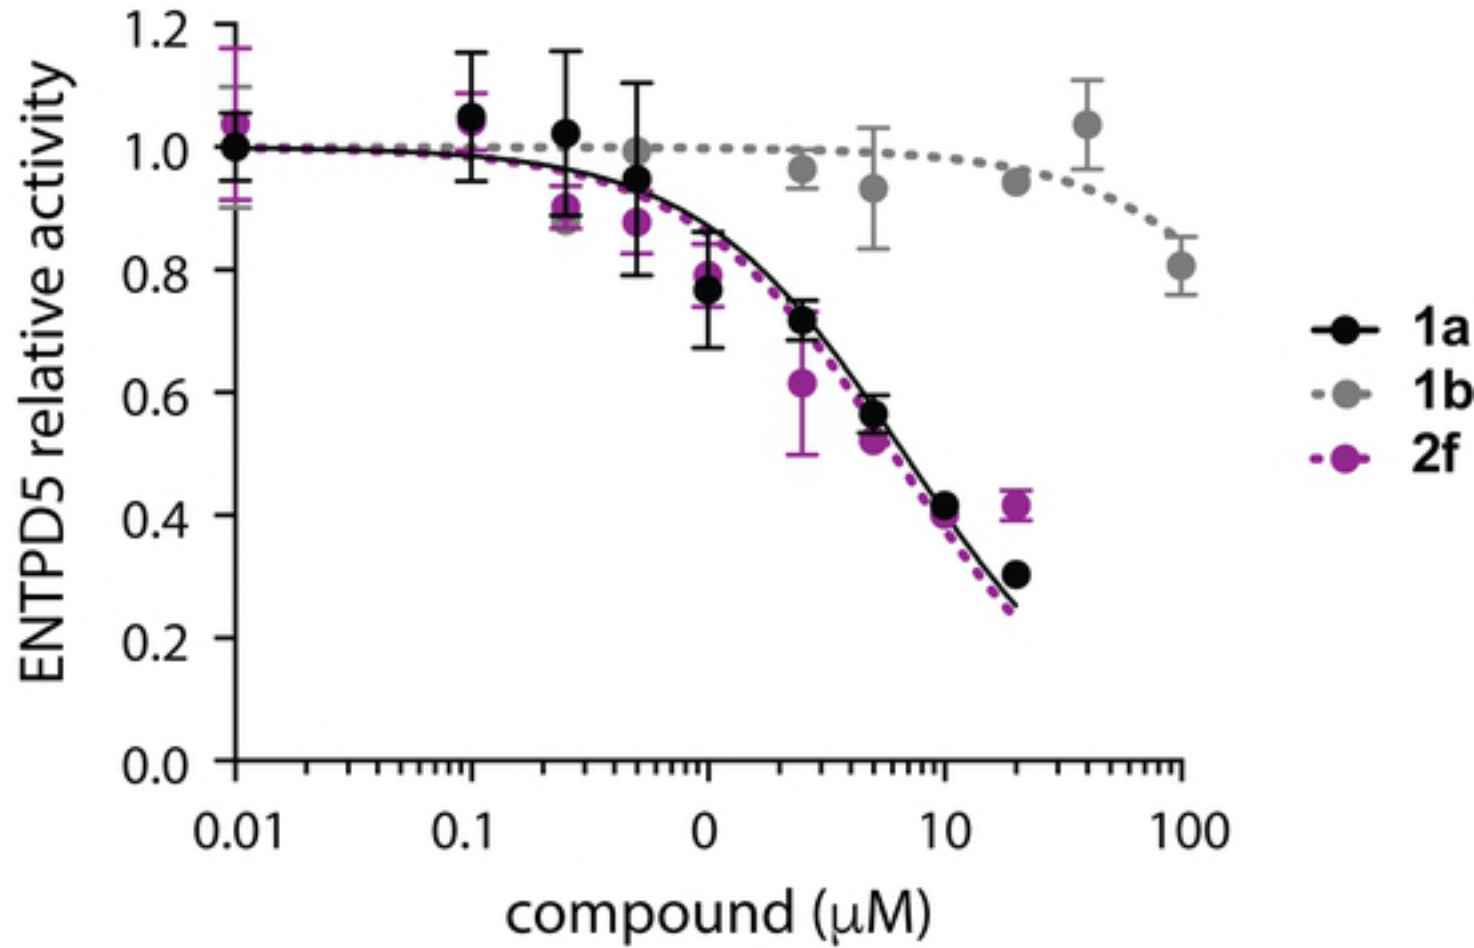

Fig. 5

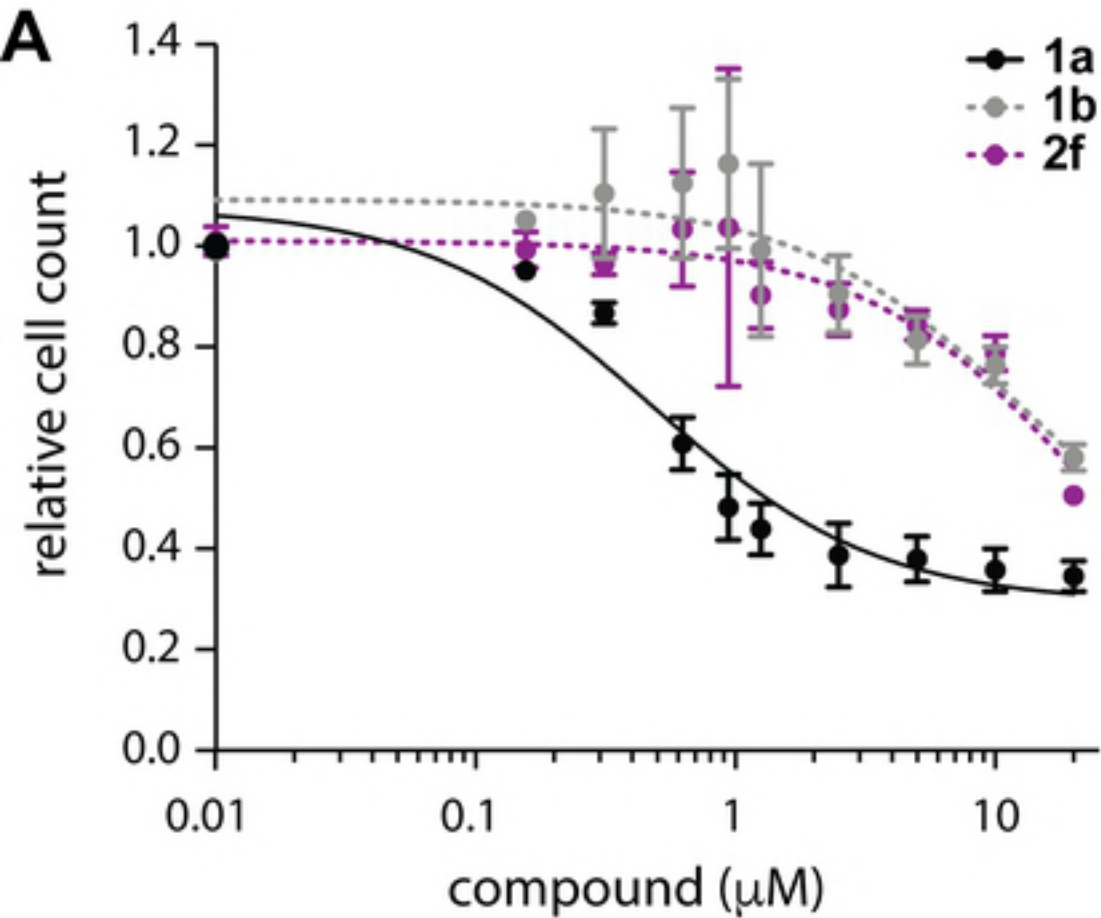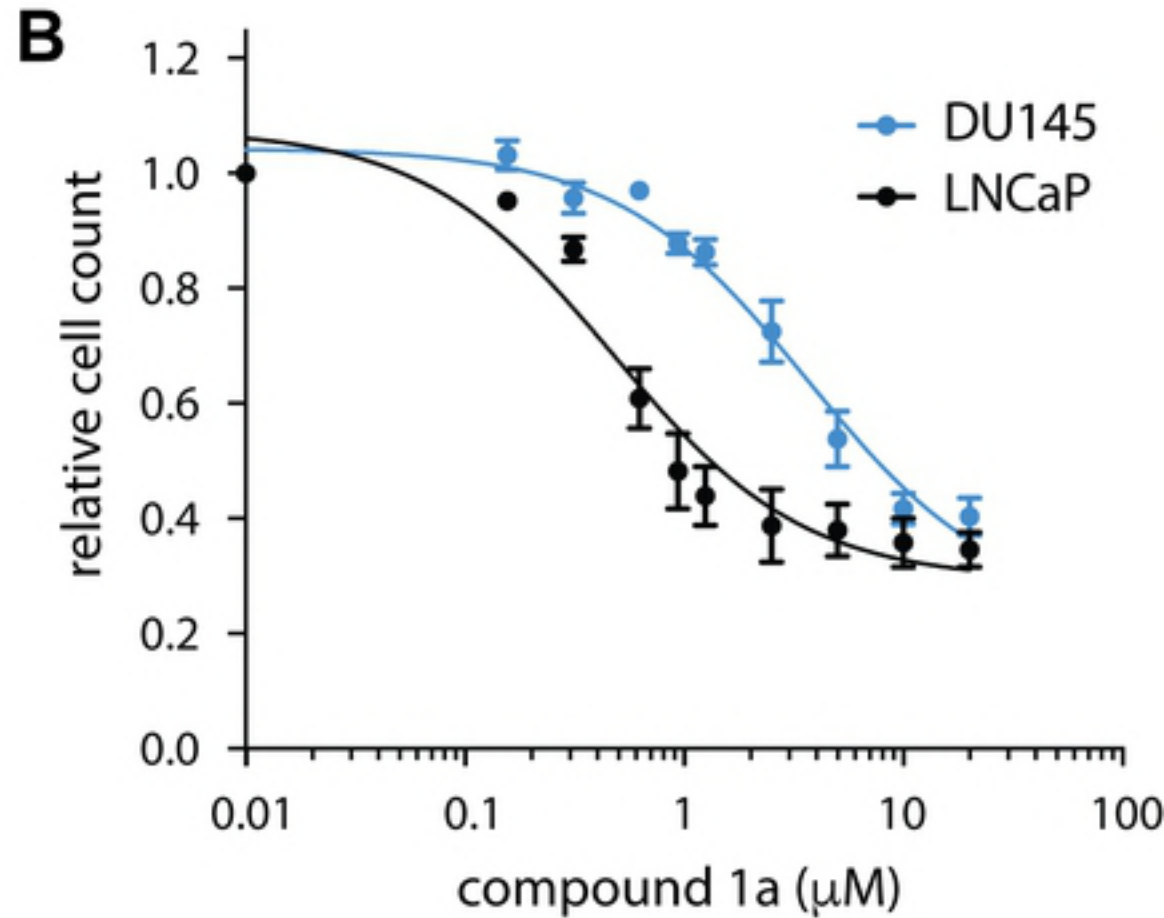

Fig. 6

**A**

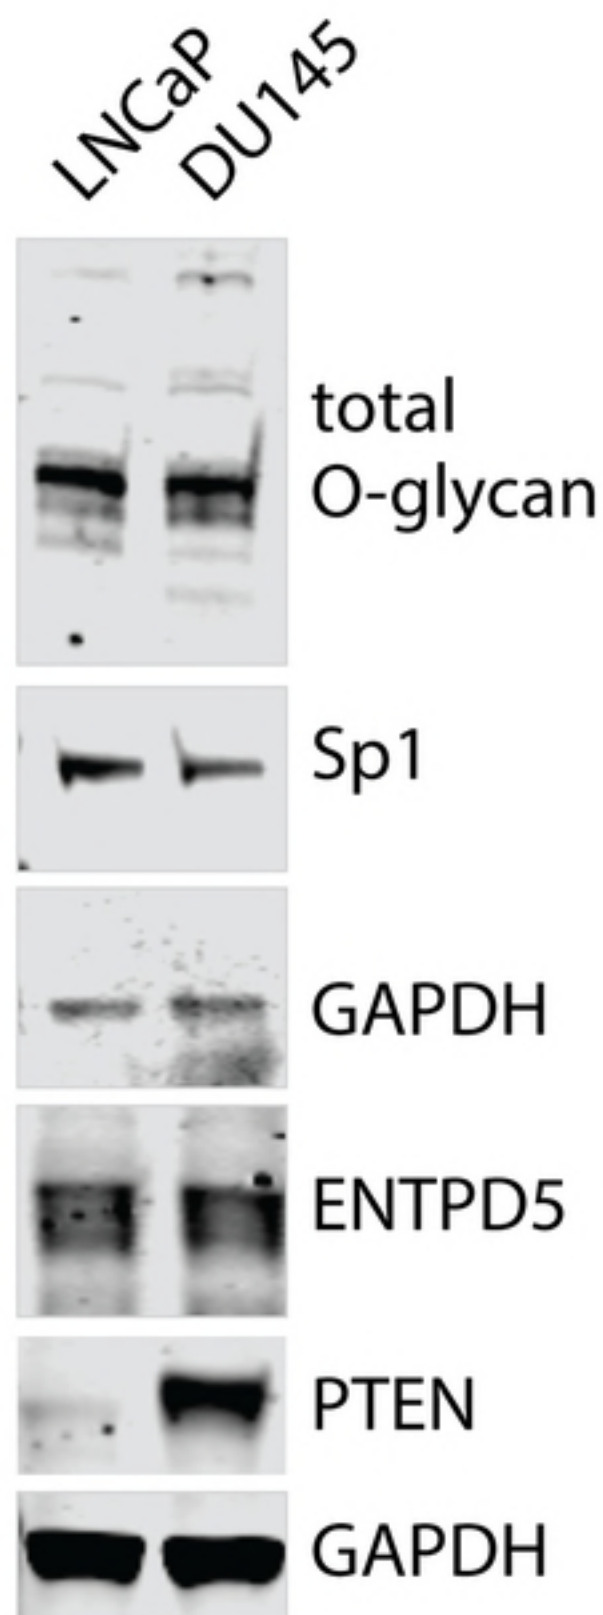

**B**

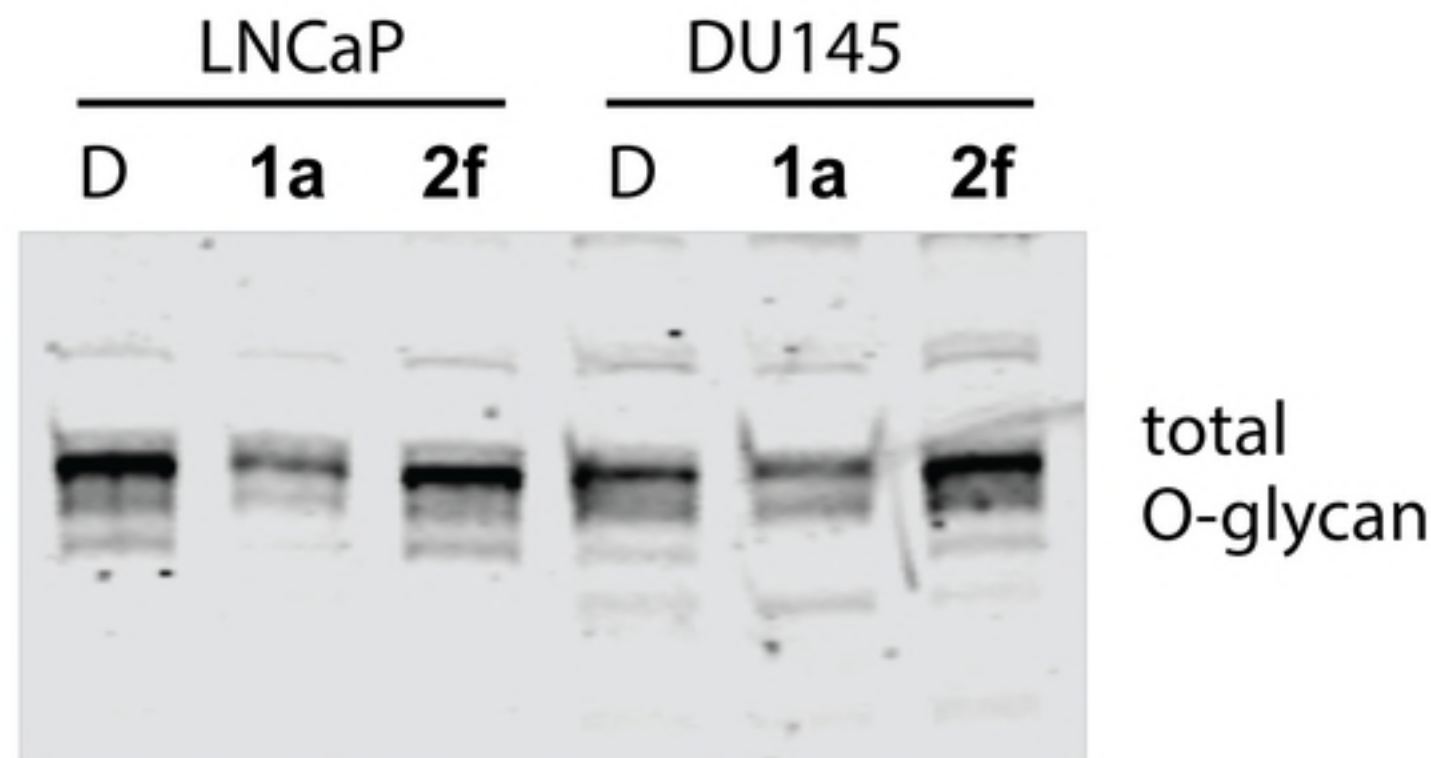

**C**

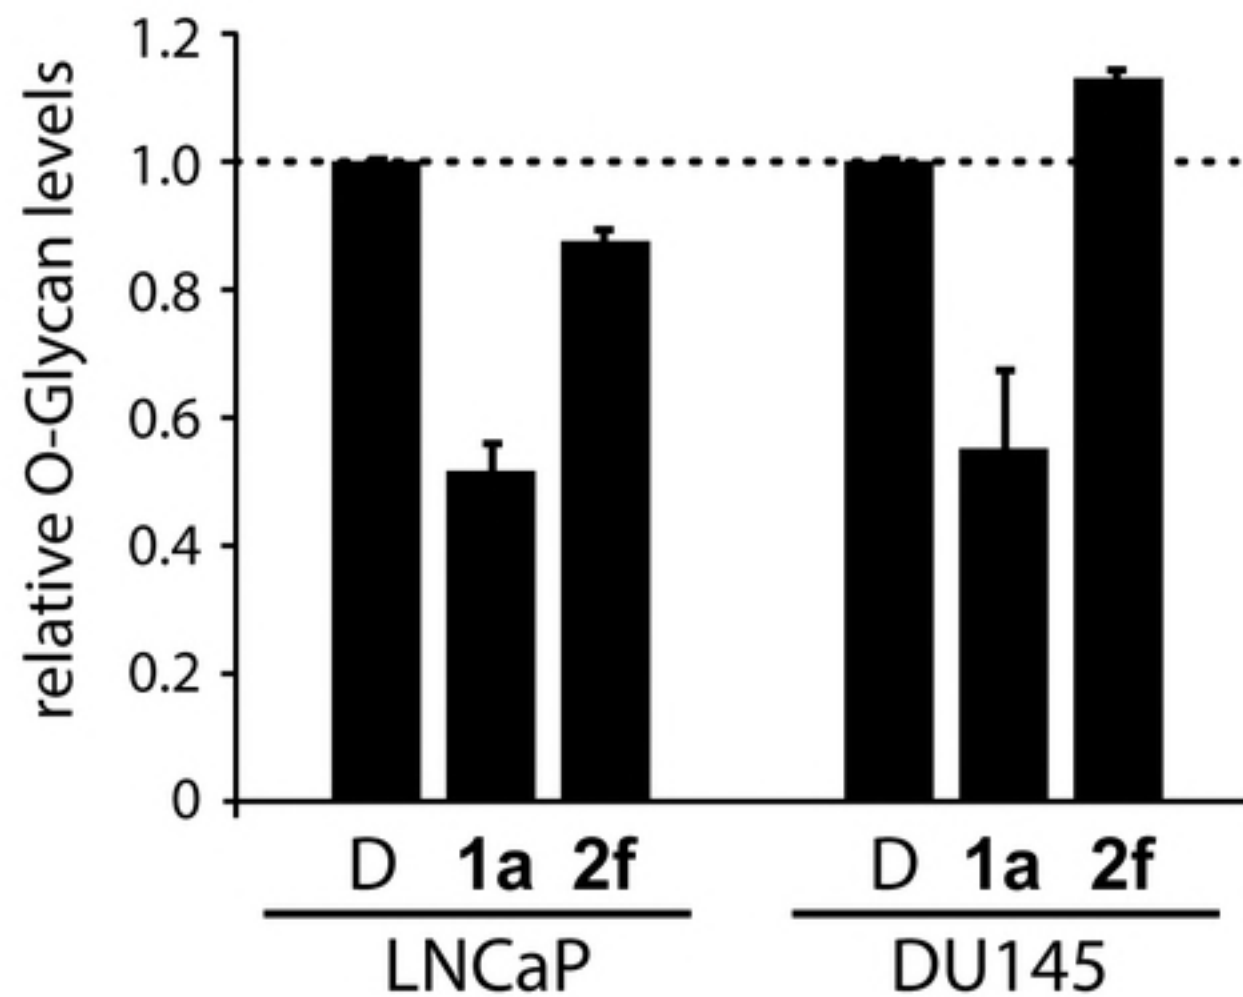

Fig. 7
